# Supplementary material
Source: publisher figshare collection journal article supplement (https://gsajournals.figshare.com/articles/dataset/_/6510158)
Supplement: Supplementary file 1 [file 2]

## Sheet: P0_BroodSize
condition	replicate	worm_number	total_brood	censoring_notes
control	LC10	1	262
control	LC10	2	199
control	LC10	3	296
control	LC10	4	222
control	LC10	5	259
control	LC10	6	277
control	LC10	7	164
control	LC10	8	165
control	LC10	9	250
control	LC10	10	229
control	LC10	11	277
control	LC10	12	305
control	LC10	13	217
control	LC10	14	277
control	LC10	15	293
control	LC10	16	246
control	LC10	17	257
control	LC10	18	276
postdauer	LC10	1	157
postdauer	LC10	2	184
postdauer	LC10	3	238
postdauer	LC10	4	212
postdauer	LC10	5	208
postdauer	LC10	6	179
postdauer	LC10	7	236
postdauer	LC10	8	223
postdauer	LC10	9	89
postdauer	LC10	10	226
postdauer	LC10	11	171
postdauer	LC10	12	210
postdauer	LC10	13	125
postdauer	LC10	14	230
postdauer	LC10	15	221
postdauer	LC10	16	198
postdauer	LC10	17	219
postdauer	LC10	18	130
control	LC11	1	246
control	LC11	2	239
control	LC11	3	305
control	LC11	4	335
control	LC11	5	283
control	LC11	6	234
control	LC11	7	257
control	LC11	8	315
control	LC11	9	278
control	LC11	10	343
control	LC11	11	248
control	LC11	12	279
control	LC11	13	224
control	LC11	14	316
control	LC11	15	371
control	LC11	16	250
control	LC11	17	259
control	LC11	18	256
postdauer	LC11	1	172
postdauer	LC11	2	335
postdauer	LC11	3	326
postdauer	LC11	4	295
postdauer	LC11	5	290
postdauer	LC11	6	218
postdauer	LC11	7	328
postdauer	LC11	8	120
postdauer	LC11	9	313
postdauer	LC11	10	347
postdauer	LC11	11	307
postdauer	LC11	12	299
postdauer	LC11	13	371
control	LC12	1	339
control	LC12	2	250
control	LC12	3	203
control	LC12	4	258
control	LC12	5	267
control	LC12	6	277
control	LC12	7	281
control	LC12	8	327
control	LC12	9	233
control	LC12	10	336
control	LC12	11	275
control	LC12	12	325
control	LC12	13	279
control	LC12	14	246
control	LC12	15	230
control	LC12	16	287
control	LC12	17	254
control	LC12	18	251
postdauer	LC12	1	159
postdauer	LC12	2	173
postdauer	LC12	3	110
postdauer	LC12	4	94
postdauer	LC12	5	228
postdauer	LC12	6	212
postdauer	LC12	7	189
postdauer	LC12	8	211
postdauer	LC12	9	249
postdauer	LC12	10	194
postdauer	LC12	11	223
postdauer	LC12	12	223
postdauer	LC12	13	187
postdauer	LC12	14	224
postdauer	LC12	15	186
postdauer	LC12	16	125
postdauer	LC12	17	4
postdauer	LC12	18	51
control	LC14	1	276
control	LC14	2	239
control	LC14	3	203
control	LC14	4	260
control	LC14	5	248
control	LC14	6	296
control	LC14	7	209
control	LC14	8	270
control	LC14	9	290
control	LC14	10	288
control	LC14	11	294
control	LC14	12	262
control	LC14	13	245
control	LC14	14	238
control	LC14	15	285
control	LC14	16	246
control	LC14	17	225
control	LC14	18	231
postdauer	LC14	1	359
postdauer	LC14	2	324
postdauer	LC14	3	286
postdauer	LC14	4	252
postdauer	LC14	5	91
postdauer	LC14	6	339
postdauer	LC14	7	253
postdauer	LC14	8	204
postdauer	LC14	9	367
postdauer	LC14	10	41
postdauer	LC14	11	217
postdauer	LC14	12	38
postdauer	LC14	13	113
postdauer	LC14	14	302
postdauer	LC14	15	228
postdauer	LC14	16	294
postdauer	LC14	17	353
postdauer	LC14	18	69
postdauer	rep2	1	85
postdauer	rep2	2		bagged
postdauer	rep2	3		bagged
postdauer	rep2	4		male worm
postdauer	rep2	5	147
postdauer	rep2	6	162
postdauer	rep2	7	119
postdauer	rep2	8		died
postdauer	rep2	9	109
postdauer	rep2	10	201
postdauer	rep2	11	109
postdauer	rep2	12	64
postdauer	rep2	13	126
postdauer	rep2	14	100
postdauer	rep2	15	163
postdauer	rep2	16	241
postdauer	rep2	17		bagged
postdauer	rep2	18	109
control	rep2	1	165
control	rep2	2	194
control	rep2	3	220
control	rep2	4		bagged
control	rep2	5	118
control	rep2	6	269
control	rep2	7	185
control	rep2	8	186
control	rep2	9	164
control	rep2	10	236
control	rep2	11	122
control	rep2	12	186
control	rep2	13	224
control	rep2	14	194
control	rep2	15	197
control	rep2	16	196
control	rep2	17	209
control	rep2	18		bagged
postdauer	rep3	1	132
postdauer	rep3	2	124
postdauer	rep3	3	154
postdauer	rep3	4	269
postdauer	rep3	5	230
postdauer	rep3	6	198
postdauer	rep3	7	151
postdauer	rep3	8	140
postdauer	rep3	9	219
postdauer	rep3	10	244
postdauer	rep3	11	83
postdauer	rep3	12	165
postdauer	rep3	13	107
postdauer	rep3	14	177
postdauer	rep3	15	366
postdauer	rep3	16	106
postdauer	rep3	17	111
postdauer	rep3	18	143
control	rep3	1	196
control	rep3	2	206
control	rep3	3	54
control	rep3	4	134
control	rep3	5	72
control	rep3	6	192
control	rep3	7	182
control	rep3	8	156
control	rep3	9	152
control	rep3	10	230
control	rep3	11	112
control	rep3	12	181
control	rep3	13	127
control	rep3	14	155
control	rep3	15	198
control	rep3	16	76
control	rep3	17	232
control	rep3	18	135
postdauer	rep4	1	81
postdauer	rep4	2	197
postdauer	rep4	3	132
postdauer	rep4	4	122
postdauer	rep4	5	169
postdauer	rep4	6	213
postdauer	rep4	7	162
postdauer	rep4	8	194
postdauer	rep4	9	132
postdauer	rep4	10	86
postdauer	rep4	11		bagged
postdauer	rep4	12	120
postdauer	rep4	13	149
postdauer	rep4	14	141
postdauer	rep4	15	194
postdauer	rep4	16	110
postdauer	rep4	17	87
postdauer	rep4	18	208
control	rep4	1	160
control	rep4	2		dead
control	rep4	3	203
control	rep4	4	222
control	rep4	5	190
control	rep4	6		bagged
control	rep4	7	184
control	rep4	8	189
control	rep4	9	189
control	rep4	10	202
control	rep4	11	184
control	rep4	12	205
control	rep4	13		bagged
control	rep4	14	216
control	rep4	15	262
control	rep4	16		dead
control	rep4	17	286
control	rep4	18	229

## Sheet: F1_EmbryoLength
condition	generation	replicate	worm_number	length
control	F1	rep1	1	56.9507
control	F1	rep1	2	58.8686
control	F1	rep1	3	55.3524
control	F1	rep1	4	56.5245
control	F1	rep1	5	52.4223
control	F1	rep1	6	53.8075
control	F1	rep1	7	53.1149
control	F1	rep1	8	53.328
control	F1	rep1	9	52.1027
control	F1	rep1	10	54.8197
control	F1	rep1	11	55.9917
control	F1	rep1	12	50.9839
control	F1	rep1	13	55.7254
control	F1	rep1	14	53.4878
control	F1	rep1	15	53.0083
control	F1	rep1	16	48.6931
control	F1	rep1	17	55.0328
control	F1	rep1	18	52.4756
control	F1	rep1	19	52.5821
control	F1	rep1	20	54.0206
control	F1	rep1	21	59.0284
control	F1	rep1	22	50.5044
control	F1	rep1	23	53.5411
control	F1	rep1	24	53.2747
control	F1	rep1	25	54.3402
control	F1	rep1	26	55.7254
control	F1	rep1	27	53.6476
control	F1	rep1	28	49.8651
control	F1	rep1	29	53.1149
control	F1	rep1	30	54.5
control	F1	rep1	31	54.3402
control	F1	rep1	32	52.4223
control	F1	rep1	33	53.8607
control	F1	rep1	34	53.914
control	F1	rep1	35	56.2581
control	F1	rep1	36	56.631
control	F1	rep1	37	55.6721
control	F1	rep1	38	53.3813
control	F1	rep1	39	53.6476
control	F1	rep1	40	52.0494
control	F1	rep1	41	56.2581
control	F1	rep1	42	53.9673
control	F1	rep1	43	53.2214
control	F1	rep1	44	51.3036
control	F1	rep1	45	53.0083
control	F1	rep1	46	54.1804
control	F1	rep1	47	54.4468
control	F1	rep1	48	55.5655
control	F1	rep1	49	51.6765
control	F1	rep1	50	58.3358
control	F1	rep1	51	55.4057
control	F1	rep1	52	51.1437
control	F1	rep1	53	56.2048
control	F1	rep1	54	52.9018
control	F1	rep1	55	50.1315
control	F1	rep1	56	53.3813
control	F1	rep1	57	47.2014
control	F1	rep1	58	55.6721
control	F1	rep1	59	56.4179
control	F1	rep1	60	54.873
control	F1	rep1	61	53.0616
postdauer	F1	rep1	1	63.0773
postdauer	F1	rep1	2	52.156
postdauer	F1	rep1	3	55.9917
postdauer	F1	rep1	4	54.3935
postdauer	F1	rep1	5	50.9306
postdauer	F1	rep1	6	55.8852
postdauer	F1	rep1	7	49.2258
postdauer	F1	rep1	8	64.2493
postdauer	F1	rep1	9	52.6887
postdauer	F1	rep1	10	61.2127
postdauer	F1	rep1	11	50.0782
postdauer	F1	rep1	12	51.2503
postdauer	F1	rep1	13	52.9551
postdauer	F1	rep1	14	43.3123
postdauer	F1	rep1	15	48.7996
postdauer	F1	rep1	16	50.7175
postdauer	F1	rep1	17	56.045
postdauer	F1	rep1	18	49.4922
postdauer	F1	rep1	19	55.6188
postdauer	F1	rep1	20	57.9096
postdauer	F1	rep1	21	46.7752
postdauer	F1	rep1	22	55.4057
postdauer	F1	rep1	23	52.156
postdauer	F1	rep1	24	56.2048
postdauer	F1	rep1	25	55.3524
postdauer	F1	rep1	26	59.0817
postdauer	F1	rep1	27	52.156
postdauer	F1	rep1	28	57.6432
postdauer	F1	rep1	29	58.7087
postdauer	F1	rep1	30	53.4878
postdauer	F1	rep1	31	56.8441
postdauer	F1	rep1	32	57.3769
postdauer	F1	rep1	33	51.197
postdauer	F1	rep1	34	56.7376
postdauer	F1	rep1	35	57.59
postdauer	F1	rep1	36	56.1516
postdauer	F1	rep1	37	55.5123
postdauer	F1	rep1	38	50.7175
postdauer	F1	rep1	39	54.8197
postdauer	F1	rep1	40	59.7742
postdauer	F1	rep1	41	48.4267
postdauer	F1	rep1	42	53.2747
postdauer	F1	rep1	43	48.48
postdauer	F1	rep1	44	57.9096
postdauer	F1	rep1	45	58.0694
postdauer	F1	rep1	46	58.6555
postdauer	F1	rep1	47	53.6476
postdauer	F1	rep1	48	56.7909
postdauer	F1	rep1	49	58.4424
postdauer	F1	rep1	50	53.7542
postdauer	F1	rep1	51	56.9507
postdauer	F1	rep1	52	47.3612
postdauer	F1	rep1	53	65.9541
postdauer	F1	rep1	54	54.3935
postdauer	F1	rep1	55	55.1393
postdauer	F1	rep1	56	60.9996
postdauer	F1	rep1	57	58.1227
postdauer	F1	rep1	58	53.3813
postdauer	F1	rep1	59	54.5
postdauer	F1	rep1	60	57.59
postdauer	F1	rep1	61	45.3368
postdauer	F1	rep1	62	44.0049
postdauer	F1	rep1	63	53.9673
postdauer	F1	rep1	64	50.5577
postdauer	F1	rep1	65	54.3935
postdauer	F1	rep1	66	56.7909
postdauer	F1	rep1	67	53.9673
postdauer	F1	rep1	68	54.8197
postdauer	F1	rep1	69	48.7996
postdauer	F1	rep1	70	55.5655
control	F1	rep2	1	57.5367
control	F1	rep2	2	54.9262
control	F1	rep2	3	50.8774
control	F1	rep2	4	51.5699
control	F1	rep2	5	46.7219
control	F1	rep2	6	52.4223
control	F1	rep2	7	55.9385
control	F1	rep2	8	48.2136
control	F1	rep2	9	50.7175
control	F1	rep2	10	50.8241
control	F1	rep2	11	53.0083
control	F1	rep2	12	56.8441
control	F1	rep2	13	50.8774
control	F1	rep2	14	53.8075
control	F1	rep2	15	52.2625
control	F1	rep2	16	50.025
control	F1	rep2	17	54.6066
control	F1	rep2	18	54.0738
control	F1	rep2	19	53.8075
control	F1	rep2	20	55.0861
control	F1	rep2	21	57.6965
control	F1	rep2	22	53.2214
control	F1	rep2	23	50.3979
control	F1	rep2	24	52.8485
control	F1	rep2	25	52.8485
control	F1	rep2	26	49.0127
control	F1	rep2	27	57.6965
control	F1	rep2	28	52.3691
control	F1	rep2	29	51.3036
control	F1	rep2	30	50.8241
control	F1	rep2	31	53.0616
control	F1	rep2	32	56.8974
control	F1	rep2	33	50.4512
control	F1	rep2	34	54.3402
control	F1	rep2	35	54.0738
control	F1	rep2	36	55.6721
control	F1	rep2	37	49.2791
control	F1	rep2	38	51.4101
control	F1	rep2	39	55.3524
control	F1	rep2	40	57.004
control	F1	rep2	41	54.5533
control	F1	rep2	42	49.2258
postdauer	F1	rep2	1	50.9839
postdauer	F1	rep2	2	48.6931
postdauer	F1	rep2	3	48.0538
postdauer	F1	rep2	4	51.3568
postdauer	F1	rep2	5	48.2136
postdauer	F1	rep2	6	49.9717
postdauer	F1	rep2	7	50.8241
postdauer	F1	rep2	8	52.1027
postdauer	F1	rep2	9	49.0127
postdauer	F1	rep2	10	51.197
postdauer	F1	rep2	11	51.6765
postdauer	F1	rep2	12	49.652
postdauer	F1	rep2	13	52.8485
postdauer	F1	rep2	14	49.4922
postdauer	F1	rep2	15	51.783
postdauer	F1	rep2	16	48.2669
postdauer	F1	rep2	17	53.5411
postdauer	F1	rep2	18	48.0538
postdauer	F1	rep2	19	47.2014
postdauer	F1	rep2	20	53.5944
postdauer	F1	rep2	21	48.9595
postdauer	F1	rep2	22	49.1726
postdauer	F1	rep2	23	50.6643
postdauer	F1	rep2	24	53.5944
postdauer	F1	rep2	25	51.9429
postdauer	F1	rep2	26	54.7131
postdauer	F1	rep2	27	52.9551
postdauer	F1	rep2	28	45.8695
postdauer	F1	rep2	29	53.5944
postdauer	F1	rep2	30	52.8485
postdauer	F1	rep2	31	49.7053
postdauer	F1	rep2	32	53.2214
postdauer	F1	rep2	33	51.9429
postdauer	F1	rep2	34	45.9228
postdauer	F1	rep2	35	48.7464
postdauer	F1	rep2	36	52.4223
postdauer	F1	rep2	37	51.0905
postdauer	F1	rep2	38	48.0005
postdauer	F1	rep2	39	47.6276
postdauer	F1	rep2	40	51.3568
postdauer	F1	rep2	41	48.3734
postdauer	F1	rep2	42	49.7053
control	F1	rep3	1	55.2459
control	F1	rep3	2	56.4179
control	F1	rep3	3	53.9673
control	F1	rep3	4	46.6687
control	F1	rep3	5	52.1027
control	F1	rep3	6	54.8197
control	F1	rep3	7	58.6555
control	F1	rep3	8	53.6476
control	F1	rep3	9	54.1271
control	F1	rep3	10	51.4101
control	F1	rep3	11	52.6354
control	F1	rep3	12	48.0005
control	F1	rep3	13	50.9306
control	F1	rep3	14	52.4756
control	F1	rep3	15	55.2992
control	F1	rep3	16	56.2048
control	F1	rep3	17	52.9018
control	F1	rep3	18	56.1516
control	F1	rep3	19	56.8441
control	F1	rep3	20	53.5411
control	F1	rep3	21	50.8241
control	F1	rep3	22	53.4345
control	F1	rep3	23	53.2214
postdauer	F1	rep3	1	57.1105
postdauer	F1	rep3	2	55.2459
postdauer	F1	rep3	3	54.873
postdauer	F1	rep3	4	54.9262
postdauer	F1	rep3	5	54.0738
postdauer	F1	rep3	6	52.156
postdauer	F1	rep3	7	51.9429
postdauer	F1	rep3	8	55.7254
postdauer	F1	rep3	9	53.914
postdauer	F1	rep3	10	53.5944
postdauer	F1	rep3	11	47.4678
postdauer	F1	rep3	12	50.8774
postdauer	F1	rep3	13	50.3979
postdauer	F1	rep3	14	57.2171
postdauer	F1	rep3	15	50.5044
postdauer	F1	rep3	16	49.9184
postdauer	F1	rep3	17	57.3769
postdauer	F1	rep3	18	49.8119
postdauer	F1	rep3	19	57.59
postdauer	F1	rep3	20	50.9306
postdauer	F1	rep3	21	52.742
postdauer	F1	rep3	22	52.1027
postdauer	F1	rep3	23	50.025
postdauer	F1	rep3	24	55.0328
postdauer	F1	rep3	25	54.2337
postdauer	F1	rep3	26	55.2459
control	F1	LC10	1	52.6354
control	F1	LC10	2	50.2381
control	F1	LC10	3	52.9551
control	F1	LC10	4	52.3158
control	F1	LC10	5	50.1848
control	F1	LC10	6	50.4512
control	F1	LC10	7	52.3691
control	F1	LC10	8	49.652
control	F1	LC10	9	56.3114
control	F1	LC10	10	50.7708
control	F1	LC10	11	52.4756
control	F1	LC10	12	52.6354
control	F1	LC10	13	51.8363
control	F1	LC10	14	51.8896
control	F1	LC10	15	50.7175
control	F1	LC10	16	49.9717
control	F1	LC10	17	52.2625
control	F1	LC10	18	54.7131
control	F1	LC10	19	57.59
control	F1	LC10	20	55.9917
control	F1	LC10	21	54.5533
control	F1	LC10	22	52.3691
control	F1	LC10	23	55.5123
control	F1	LC10	24	51.2503
control	F1	LC10	25	52.9018
control	F1	LC10	26	55.2992
control	F1	LC10	27	50.8241
control	F1	LC10	28	51.783
control	F1	LC10	29	51.9429
control	F1	LC10	30	58.3891
control	F1	LC10	31	50.5044
control	F1	LC10	32	57.1105
control	F1	LC10	33	52.9551
control	F1	LC10	34	53.3813
control	F1	LC10	35	52.156
control	F1	LC10	36	52.3158
control	F1	LC10	37	50.5044
postdauer	F1	LC10	1	49.1193
postdauer	F1	LC10	2	47.5211
postdauer	F1	LC10	3	50.6643
postdauer	F1	LC10	4	45.7097
postdauer	F1	LC10	5	47.6809
postdauer	F1	LC10	6	49.9184
postdauer	F1	LC10	7	52.2625
postdauer	F1	LC10	8	46.7752
postdauer	F1	LC10	9	46.7752
postdauer	F1	LC10	10	47.0416
postdauer	F1	LC10	11	51.4101
postdauer	F1	LC10	12	50.8241
postdauer	F1	LC10	13	47.7874
postdauer	F1	LC10	14	48.9595
postdauer	F1	LC10	15	47.7874
postdauer	F1	LC10	16	50.3979
postdauer	F1	LC10	17	54.0738
postdauer	F1	LC10	18	48.9062
postdauer	F1	LC10	19	52.6887
postdauer	F1	LC10	20	53.5944
postdauer	F1	LC10	21	51.8363
postdauer	F1	LC10	22	44.9106
postdauer	F1	LC10	23	49.2258
postdauer	F1	LC10	24	46.1892
postdauer	F1	LC10	25	49.8119
postdauer	F1	LC10	26	51.2503
postdauer	F1	LC10	27	44.4844
postdauer	F1	LC10	28	52.9018
postdauer	F1	LC10	29	53.1149
postdauer	F1	LC10	30	45.9761
postdauer	F1	LC10	31	47.308
postdauer	F1	LC10	32	49.2791
postdauer	F1	LC10	33	41.7674
postdauer	F1	LC10	34	50.7708
postdauer	F1	LC10	35	41.9272
postdauer	F1	LC10	36	53.5944
postdauer	F1	LC10	37	47.4678
postdauer	F1	LC10	38	51.3568
control	F1	LC11	1	53.1149
control	F1	LC11	2	56.045
control	F1	LC11	3	55.5123
control	F1	LC11	4	52.3691
control	F1	LC11	5	59.348
control	F1	LC11	6	51.0372
control	F1	LC11	7	54.4468
control	F1	LC11	8	62.2249
control	F1	LC11	9	50.3446
control	F1	LC11	10	58.2825
control	F1	LC11	11	52.742
control	F1	LC11	12	57.9096
control	F1	LC11	13	50.8774
control	F1	LC11	14	54.2869
control	F1	LC11	15	53.8075
control	F1	LC11	16	57.8563
control	F1	LC11	17	53.0616
control	F1	LC11	18	51.8363
control	F1	LC11	19	58.4424
control	F1	LC11	20	53.1682
control	F1	LC11	21	58.5489
control	F1	LC11	22	58.7087
control	F1	LC11	23	50.9839
control	F1	LC11	24	53.8075
control	F1	LC11	25	56.3114
control	F1	LC11	26	52.4223
control	F1	LC11	27	55.9917
control	F1	LC11	28	57.8563
control	F1	LC11	29	51.5699
control	F1	LC11	30	54.3935
control	F1	LC11	31	53.5944
control	F1	LC11	32	57.4834
control	F1	LC11	33	55.6721
control	F1	LC11	34	53.8607
control	F1	LC11	35	56.1516
control	F1	LC11	36	51.5699
control	F1	LC11	37	55.6188
postdauer	F1	LC11	1	50.3446
postdauer	F1	LC11	2	48.0538
postdauer	F1	LC11	3	51.6765
postdauer	F1	LC11	4	52.5821
postdauer	F1	LC11	5	49.7586
postdauer	F1	LC11	6	44.6442
postdauer	F1	LC11	7	51.197
postdauer	F1	LC11	8	49.2258
postdauer	F1	LC11	9	51.8363
postdauer	F1	LC11	10	53.2747
postdauer	F1	LC11	11	47.5743
postdauer	F1	LC11	12	49.2258
postdauer	F1	LC11	13	48.9062
postdauer	F1	LC11	14	54.6066
postdauer	F1	LC11	15	50.9306
postdauer	F1	LC11	16	51.4634
postdauer	F1	LC11	17	50.1315
postdauer	F1	LC11	18	50.7175
postdauer	F1	LC11	19	52.6887
postdauer	F1	LC11	20	53.5944
postdauer	F1	LC11	21	47.3612
postdauer	F1	LC11	22	53.4878
postdauer	F1	LC11	23	48.4267
postdauer	F1	LC11	24	44.0049
postdauer	F1	LC11	25	51.9961
postdauer	F1	LC11	26	50.1315
postdauer	F1	LC11	27	51.6232
postdauer	F1	LC11	28	50.8774
postdauer	F1	LC11	29	51.9961
postdauer	F1	LC11	30	59.5611
postdauer	F1	LC11	31	51.2503
postdauer	F1	LC11	32	51.0905
postdauer	F1	LC11	33	48.0538
postdauer	F1	LC11	34	48.9062
postdauer	F1	LC11	35	55.0328
postdauer	F1	LC11	36	52.5289
postdauer	F1	LC11	37	50.4512
postdauer	F1	LC11	38	52.5289
postdauer	F1	LC11	39	53.914
control	F1	LC12	1	55.7786
control	F1	LC12	2	54.4468
control	F1	LC12	3	54.6599
control	F1	LC12	4	55.8319
control	F1	LC12	5	58.5489
control	F1	LC12	6	52.2625
control	F1	LC12	7	54.6599
control	F1	LC12	8	54.3935
control	F1	LC12	9	53.7009
control	F1	LC12	10	55.7786
control	F1	LC12	11	56.7909
control	F1	LC12	12	51.783
control	F1	LC12	13	55.459
control	F1	LC12	14	54.1271
control	F1	LC12	15	53.5944
control	F1	LC12	16	53.1149
control	F1	LC12	17	56.5245
control	F1	LC12	18	55.7254
control	F1	LC12	19	54.7664
control	F1	LC12	20	54.7131
control	F1	LC12	21	54.1804
control	F1	LC12	22	57.1638
control	F1	LC12	23	59.0817
control	F1	LC12	24	52.8485
control	F1	LC12	25	58.9751
control	F1	LC12	26	56.1516
control	F1	LC12	27	57.3769
control	F1	LC12	28	52.9551
control	F1	LC12	29	54.2337
control	F1	LC12	30	54.6599
control	F1	LC12	31	56.3114
control	F1	LC12	32	57.1638
control	F1	LC12	33	53.7009
control	F1	LC12	34	53.1149
control	F1	LC12	35	55.5123
postdauer	F1	LC12	1	51.3568
postdauer	F1	LC12	2	53.2214
postdauer	F1	LC12	3	51.7298
postdauer	F1	LC12	4	53.3813
postdauer	F1	LC12	5	52.1027
postdauer	F1	LC12	6	53.4345
postdauer	F1	LC12	7	50.1848
postdauer	F1	LC12	8	52.6887
postdauer	F1	LC12	9	51.7298
postdauer	F1	LC12	10	52.3691
postdauer	F1	LC12	11	52.4223
postdauer	F1	LC12	12	49.7586
postdauer	F1	LC12	13	53.2214
postdauer	F1	LC12	14	54.1804
postdauer	F1	LC12	15	51.3036
postdauer	F1	LC12	16	54.5
postdauer	F1	LC12	17	49.5455
postdauer	F1	LC12	18	52.2625
postdauer	F1	LC12	19	52.4756
postdauer	F1	LC12	20	46.1892
postdauer	F1	LC12	21	47.6809
postdauer	F1	LC12	22	56.045
postdauer	F1	LC12	23	55.2992
postdauer	F1	LC12	24	50.025
postdauer	F1	LC12	25	54.1271
postdauer	F1	LC12	26	54.6066
postdauer	F1	LC12	27	48.9062
postdauer	F1	LC12	28	43.7385
postdauer	F1	LC12	29	49.8651
postdauer	F1	LC12	30	52.2092
postdauer	F1	LC12	31	53.914
postdauer	F1	LC12	32	50.3446
postdauer	F1	LC12	33	53.1149
postdauer	F1	LC12	34	50.8241
postdauer	F1	LC12	35	51.7298
postdauer	F1	LC12	36	51.9961
postdauer	F1	LC12	37	50.5577
postdauer	F1	LC12	38	52.3158
postdauer	F1	LC12	39	53.4345
postdauer	F1	LC12	40	53.4878
postdauer	F1	LC12	41	49.4922

## Sheet: F1_StarveRecover_d1d8
condition	generation	replicate	day	worm_number	size
control	F1	rep1	d1	1	896.967
control	F1	rep1	d1	2	834.69
control	F1	rep1	d1	3	782.804
control	F1	rep1	d1	4	824.835
control	F1	rep1	d1	5	875.719
control	F1	rep1	d1	6	842.782
control	F1	rep1	d1	7	808.894
control	F1	rep1	d1	8	798.209
control	F1	rep1	d1	9	865.033
control	F1	rep1	d1	10	852.393
control	F1	rep1	d1	11	780.971
control	F1	rep1	d1	12	866.208
control	F1	rep1	d1	13	868.163
control	F1	rep1	d1	14	923.057
control	F1	rep1	d1	15	791.484
control	F1	rep1	d1	16	812.317
control	F1	rep1	d1	17	816.571
control	F1	rep1	d1	18	803.05
control	F1	rep1	d1	19	874.007
control	F1	rep1	d1	20	926.308
control	F1	rep1	d1	21	883.74
control	F1	rep1	d1	22	794.492
control	F1	rep1	d1	23	889.29
control	F1	rep1	d1	24	578.319
control	F1	rep1	d1	25	712.678
control	F1	rep1	d1	26	833.859
control	F1	rep1	d1	27	797.743
control	F1	rep1	d1	28	764.564
control	F1	rep1	d1	29	877.309
control	F1	rep1	d1	30	778.672
control	F1	rep1	d1	31	875.303
control	F1	rep1	d1	32	840.412
control	F1	rep1	d1	33	844.079
control	F1	rep1	d1	34	743.781
control	F1	rep1	d1	35	814.616
control	F1	rep1	d1	36	840.949
control	F1	rep1	d1	37	806.18
control	F1	rep1	d1	38	790.481
control	F1	rep1	d1	39	757.008
control	F1	rep1	d1	40	897.798
control	F1	rep1	d1	41	902.102
control	F1	rep1	d1	42	867.454
control	F1	rep1	d1	43	793.489
control	F1	rep1	d1	44	854.348
control	F1	rep1	d1	45	883.446
control	F1	rep1	d1	46	815.74
control	F1	rep1	d1	47	800.629
control	F1	rep1	d1	48	839.825
control	F1	rep1	d1	49	828.137
control	F1	rep1	d1	50	813.026
control	F1	rep1	d1	51	855.229
control	F1	rep1	d1	52	813.441
control	F1	rep1	d1	53	966.921
control	F1	rep1	d1	54	886.869
control	F1	rep1	d1	55	844.666
control	F1	rep1	d1	56	906.771
control	F1	rep1	d1	57	862.491
control	F1	rep1	d1	58	923.594
control	F1	rep1	d1	59	821.412
control	F1	rep1	d1	60	862.198
control	F1	rep1	d1	61	873.298
control	F1	rep1	d1	62	844.666
control	F1	rep1	d1	63	886.991
control	F1	rep1	d1	64	749.746
control	F1	rep1	d1	65	920.049
control	F1	rep1	d1	66	916.919
control	F1	rep1	d1	67	865.033
control	F1	rep1	d1	68	902.396
control	F1	rep1	d1	69	866.623
control	F1	rep1	d1	70	791.778
control	F1	rep1	d1	71	840.24
control	F1	rep1	d1	72	851.097
control	F1	rep1	d1	73	876.012
control	F1	rep1	d1	74	732.093
control	F1	rep1	d1	75	825.544
control	F1	rep1	d1	76	893.25
control	F1	rep1	d1	77	859.19
control	F1	rep1	d1	78	848.798
control	F1	rep1	d1	79	920.636
control	F1	rep1	d1	80	899.388
control	F1	rep1	d1	81	900.512
control	F1	rep1	d1	82	875.303
control	F1	rep1	d1	83	810.19
control	F1	rep1	d1	84	745.492
control	F1	rep1	d1	85	892.663
control	F1	rep1	d1	86	810.018
control	F1	rep1	d1	87	802.928
control	F1	rep1	d1	88	791.362
control	F1	rep1	d1	89	848.92
control	F1	rep1	d1	90	837.647
control	F1	rep1	d1	91	776.96
control	F1	rep1	d1	92	845.497
control	F1	rep1	d1	93	743.73
control	F1	rep1	d1	94	844.372
control	F1	rep1	d1	95	842.124
control	F1	rep1	d1	96	909.485
control	F1	rep1	d1	97	834.275
control	F1	rep1	d1	98	848.798
control	F1	rep1	d1	99	887.578
control	F1	rep1	d1	100	934.451
control	F1	rep1	d1	101	786.227
control	F1	rep1	d1	102	791.778
control	F1	rep1	d1	103	856.182
control	F1	rep1	d1	104	937.58
control	F1	rep1	d1	105	716.81
control	F1	rep1	d1	106	750.334
control	F1	rep1	d1	107	896.258
control	F1	rep1	d1	108	879.263
control	F1	rep1	d1	109	880.975
control	F1	rep1	d1	110	868.578
control	F1	rep1	d1	111	779.796
control	F1	rep1	d1	112	854.642
control	F1	rep1	d1	113	854.47
control	F1	rep1	d1	114	825.716
control	F1	rep1	d1	115	624.483
control	F1	rep1	d1	116	758.132
control	F1	rep1	d1	117	861.317
control	F1	rep1	d1	118	869.166
control	F1	rep1	d1	119	795.616
control	F1	rep1	d1	120	880.853
postdauer	F1	rep1	d1	1	1042.89
postdauer	F1	rep1	d1	2	988.757
postdauer	F1	rep1	d1	3	1013.97
postdauer	F1	rep1	d1	4	984.331
postdauer	F1	rep1	d1	5	984.747
postdauer	F1	rep1	d1	6	1078.54
postdauer	F1	rep1	d1	7	1008.24
postdauer	F1	rep1	d1	8	974.477
postdauer	F1	rep1	d1	9	1039.47
postdauer	F1	rep1	d1	10	967.509
postdauer	F1	rep1	d1	11	1074.82
postdauer	F1	rep1	d1	12	990.003
postdauer	F1	rep1	d1	13	1039.17
postdauer	F1	rep1	d1	14	1007.41
postdauer	F1	rep1	d1	15	989.051
postdauer	F1	rep1	d1	16	1017.51
postdauer	F1	rep1	d1	17	988.291
postdauer	F1	rep1	d1	18	981.03
postdauer	F1	rep1	d1	19	966.506
postdauer	F1	rep1	d1	20	1002.16
postdauer	F1	rep1	d1	21	984.453
postdauer	F1	rep1	d1	22	1005.58
postdauer	F1	rep1	d1	23	973.059
postdauer	F1	rep1	d1	24	941.591
postdauer	F1	rep1	d1	25	944.721
postdauer	F1	rep1	d1	26	954.818
postdauer	F1	rep1	d1	27	1022.94
postdauer	F1	rep1	d1	28	927.311
postdauer	F1	rep1	d1	29	998.733
postdauer	F1	rep1	d1	30	1016.8
postdauer	F1	rep1	d1	31	943.84
postdauer	F1	rep1	d1	32	936.75
postdauer	F1	rep1	d1	33	1019.39
postdauer	F1	rep1	d1	34	946.604
postdauer	F1	rep1	d1	35	974.942
postdauer	F1	rep1	d1	36	986.873
postdauer	F1	rep1	d1	37	1000.86
postdauer	F1	rep1	d1	38	1042.18
postdauer	F1	rep1	d1	39	1061.25
postdauer	F1	rep1	d1	40	1028.96
postdauer	F1	rep1	d1	41	1013.14
postdauer	F1	rep1	d1	42	986.63
postdauer	F1	rep1	d1	43	904.938
postdauer	F1	rep1	d1	44	1000.86
postdauer	F1	rep1	d1	45	934.866
postdauer	F1	rep1	d1	46	978.366
postdauer	F1	rep1	d1	47	1046.73
postdauer	F1	rep1	d1	48	988.707
postdauer	F1	rep1	d1	49	949.683
postdauer	F1	rep1	d1	50	994.307
postdauer	F1	rep1	d1	51	986.995
postdauer	F1	rep1	d1	52	936.578
postdauer	F1	rep1	d1	53	994.014
postdauer	F1	rep1	d1	54	959.538
postdauer	F1	rep1	d1	55	974.061
postdauer	F1	rep1	d1	56	1020.1
postdauer	F1	rep1	d1	57	990.175
postdauer	F1	rep1	d1	58	981.03
postdauer	F1	rep1	d1	59	943.009
postdauer	F1	rep1	d1	60	1002.16
postdauer	F1	rep1	d1	61	974.892
postdauer	F1	rep1	d1	62	928.02
postdauer	F1	rep1	d1	63	966.384
postdauer	F1	rep1	d1	64	937.874
postdauer	F1	rep1	d1	65	981.445
postdauer	F1	rep1	d1	66	965.797
postdauer	F1	rep1	d1	67	906.356
postdauer	F1	rep1	d1	68	1029.2
postdauer	F1	rep1	d1	69	930.197
postdauer	F1	rep1	d1	70	945.895
postdauer	F1	rep1	d1	71	958.12
postdauer	F1	rep1	d1	72	1064.85
postdauer	F1	rep1	d1	73	982.62
control	F1	rep1	d8	1	249.595
control	F1	rep1	d8	2	238.404
control	F1	rep1	d8	3	462.014
control	F1	rep1	d8	4	351.039
control	F1	rep1	d8	5	187.77
control	F1	rep1	d8	6	428.492
control	F1	rep1	d8	7	245.336
control	F1	rep1	d8	8	506.728
control	F1	rep1	d8	9	462.14
control	F1	rep1	d8	10	469.625
control	F1	rep1	d8	11	399.887
control	F1	rep1	d8	12	356.509
control	F1	rep1	d8	13	303.152
postdauer	F1	rep1	d8	1	263.71
postdauer	F1	rep1	d8	2	256.955
postdauer	F1	rep1	d8	3	252.696
postdauer	F1	rep1	d8	4	338.616
postdauer	F1	rep1	d8	5	254.763
postdauer	F1	rep1	d8	6	340.505
postdauer	F1	rep1	d8	7	485.984
postdauer	F1	rep1	d8	8	325.963
postdauer	F1	rep1	d8	9	321.024
postdauer	F1	rep1	d8	10	483.614
postdauer	F1	rep1	d8	11	238.529
postdauer	F1	rep1	d8	12	333.072
control	F1	rep2	d1	1	930.025
control	F1	rep2	d1	2	846.965
control	F1	rep2	d1	3	597.978
control	F1	rep2	d1	4	754.172
control	F1	rep2	d1	5	756.471
control	F1	rep2	d1	6	804.053
control	F1	rep2	d1	7	678.911
control	F1	rep2	d1	8	815.031
control	F1	rep2	d1	9	687.469
control	F1	rep2	d1	10	763.855
control	F1	rep2	d1	11	839.116
control	F1	rep2	d1	12	777.963
control	F1	rep2	d1	13	924.768
control	F1	rep2	d1	14	770.164
control	F1	rep2	d1	15	615.094
control	F1	rep2	d1	16	738.059
control	F1	rep2	d1	17	733.217
control	F1	rep2	d1	18	817.867
control	F1	rep2	d1	19	615.925
control	F1	rep2	d1	20	705.831
control	F1	rep2	d1	21	842.539
control	F1	rep2	d1	22	759.307
control	F1	rep2	d1	23	819.579
control	F1	rep2	d1	24	861.61
control	F1	rep2	d1	25	814.15
control	F1	rep2	d1	26	838.528
control	F1	rep2	d1	27	720.527
control	F1	rep2	d1	28	762.852
control	F1	rep2	d1	29	721.236
control	F1	rep2	d1	30	865.327
control	F1	rep2	d1	31	827.793
control	F1	rep2	d1	32	688.765
control	F1	rep2	d1	33	810.312
control	F1	rep2	d1	34	753.879
control	F1	rep2	d1	35	771.997
control	F1	rep2	d1	36	737.056
control	F1	rep2	d1	37	773.709
control	F1	rep2	d1	38	719.818
control	F1	rep2	d1	39	774.124
control	F1	rep2	d1	40	605.118
control	F1	rep2	d1	41	578.026
control	F1	rep2	d1	42	809.896
control	F1	rep2	d1	43	861.195
control	F1	rep2	d1	44	775.836
control	F1	rep2	d1	45	758.72
control	F1	rep2	d1	46	757.423
control	F1	rep2	d1	47	820.288
control	F1	rep2	d1	48	797.034
control	F1	rep2	d1	49	681.747
control	F1	rep2	d1	50	805.177
postdauer	F1	rep2	d1	1	707.837
postdauer	F1	rep2	d1	2	758.598
postdauer	F1	rep2	d1	3	754.587
postdauer	F1	rep2	d1	4	679.498
postdauer	F1	rep2	d1	5	693.607
postdauer	F1	rep2	d1	6	770.114
postdauer	F1	rep2	d1	7	744.146
postdauer	F1	rep2	d1	8	779.847
postdauer	F1	rep2	d1	9	681.038
postdauer	F1	rep2	d1	10	602.819
postdauer	F1	rep2	d1	11	772.706
postdauer	F1	rep2	d1	12	787.23
postdauer	F1	rep2	d1	13	799.505
postdauer	F1	rep2	d1	14	676.662
postdauer	F1	rep2	d1	15	849.801
postdauer	F1	rep2	d1	16	646.147
postdauer	F1	rep2	d1	17	749.453
postdauer	F1	rep2	d1	18	819.751
postdauer	F1	rep2	d1	19	814.738
postdauer	F1	rep2	d1	20	861.023
postdauer	F1	rep2	d1	21	742.019
postdauer	F1	rep2	d1	22	871.465
postdauer	F1	rep2	d1	23	638.591
postdauer	F1	rep2	d1	24	830.558
postdauer	F1	rep2	d1	25	817.867
postdauer	F1	rep2	d1	26	640.718
postdauer	F1	rep2	d1	27	836.401
postdauer	F1	rep2	d1	28	675.903
postdauer	F1	rep2	d1	29	762.73
postdauer	F1	rep2	d1	30	796.203
postdauer	F1	rep2	d1	31	834.518
postdauer	F1	rep2	d1	32	838.407
postdauer	F1	rep2	d1	33	837.941
postdauer	F1	rep2	d1	34	716.101
postdauer	F1	rep2	d1	35	776.423
postdauer	F1	rep2	d1	36	782.976
postdauer	F1	rep2	d1	37	808.479
postdauer	F1	rep2	d1	38	829.677
postdauer	F1	rep2	d1	39	697.324
postdauer	F1	rep2	d1	40	791.95
postdauer	F1	rep2	d1	41	813.441
postdauer	F1	rep2	d1	42	749.918
postdauer	F1	rep2	d1	43	808.307
postdauer	F1	rep2	d1	44	825.423
postdauer	F1	rep2	d1	45	816.865
postdauer	F1	rep2	d1	46	762.558
postdauer	F1	rep2	d1	47	686.76
postdauer	F1	rep2	d1	48	788.82
postdauer	F1	rep2	d1	49	754
postdauer	F1	rep2	d1	50	827.256
postdauer	F1	rep2	d1	51	617.221
postdauer	F1	rep2	d1	52	770.114
postdauer	F1	rep2	d1	53	699.451
postdauer	F1	rep2	d1	54	652.406
postdauer	F1	rep2	d1	55	837.232
control	F1	rep2	d8	1	451.972
control	F1	rep2	d8	2	224.291
control	F1	rep2	d8	3	315.376
control	F1	rep2	d8	4	346.314
control	F1	rep2	d8	5	580.742
control	F1	rep2	d8	6	282.587
control	F1	rep2	d8	7	581.066
control	F1	rep2	d8	8	571.922
control	F1	rep2	d8	9	342.704
control	F1	rep2	d8	10	367.709
control	F1	rep2	d8	11	353.564
control	F1	rep2	d8	12	342.881
control	F1	rep2	d8	13	238.259
control	F1	rep2	d8	14	498.623
control	F1	rep2	d8	15	413.502
control	F1	rep2	d8	16	438.078
control	F1	rep2	d8	17	516.053
control	F1	rep2	d8	18	582.458
control	F1	rep2	d8	19	397.892
control	F1	rep2	d8	20	474.225
control	F1	rep2	d8	21	447.296
control	F1	rep2	d8	22	259.225
control	F1	rep2	d8	23	571.064
control	F1	rep2	d8	24	570.635
control	F1	rep2	d8	25	291.051
control	F1	rep2	d8	26	305.876
control	F1	rep2	d8	27	311.84
control	F1	rep2	d8	28	331.74
control	F1	rep2	d8	29	345.811
control	F1	rep2	d8	30	427.898
control	F1	rep2	d8	31	432.323
control	F1	rep2	d8	32	456.869
control	F1	rep2	d8	33	214.645
control	F1	rep2	d8	34	566.137
control	F1	rep2	d8	35	362.634
control	F1	rep2	d8	36	333.204
control	F1	rep2	d8	37	469.475
control	F1	rep2	d8	38	322.271
control	F1	rep2	d8	39	335.453
control	F1	rep2	d8	40	471.976
control	F1	rep2	d8	41	332.095
control	F1	rep2	d8	42	308.732
control	F1	rep2	d8	43	493.696
control	F1	rep2	d8	44	519.13
control	F1	rep2	d8	45	395.361
control	F1	rep2	d8	46	494.983
control	F1	rep2	d8	47	408.428
control	F1	rep2	d8	48	658.331
control	F1	rep2	d8	49	513.479
control	F1	rep2	d8	50	479.551
control	F1	rep2	d8	51	352.099
control	F1	rep2	d8	52	526.662
control	F1	rep2	d8	53	628.576
control	F1	rep2	d8	54	353.815
control	F1	rep2	d8	55	241.973
postdauer	F1	rep2	d8	1	562.497
postdauer	F1	rep2	d8	2	367.353
postdauer	F1	rep2	d8	3	421.359
postdauer	F1	rep2	d8	4	376.424
postdauer	F1	rep2	d8	5	471.369
postdauer	F1	rep2	d8	6	210.324
postdauer	F1	rep2	d8	7	323.735
postdauer	F1	rep2	d8	8	349.169
postdauer	F1	rep2	d8	9	190.498
postdauer	F1	rep2	d8	10	307.268
postdauer	F1	rep2	d8	11	213.002
postdauer	F1	rep2	d8	12	199.642
postdauer	F1	rep2	d8	13	453.762
postdauer	F1	rep2	d8	14	224.469
postdauer	F1	rep2	d8	15	375.106
postdauer	F1	rep2	d8	16	450.477
postdauer	F1	rep2	d8	17	341.815
postdauer	F1	rep2	d8	18	360.532
postdauer	F1	rep2	d8	19	242.224
postdauer	F1	rep2	d8	20	429.823
postdauer	F1	rep2	d8	21	377.711
postdauer	F1	rep2	d8	22	377.282
postdauer	F1	rep2	d8	23	387.106
postdauer	F1	rep2	d8	24	509.054
postdauer	F1	rep2	d8	25	412.895
postdauer	F1	rep2	d8	26	321.664
postdauer	F1	rep2	d8	27	214.038
control	F1	rep3	d1	1	881.856
control	F1	rep3	d1	2	906.062
control	F1	rep3	d1	3	655.242
control	F1	rep3	d1	4	691.48
control	F1	rep3	d1	5	788.77
control	F1	rep3	d1	6	965.503
control	F1	rep3	d1	7	803.465
control	F1	rep3	d1	8	811.142
control	F1	rep3	d1	9	736.762
control	F1	rep3	d1	10	701.405
control	F1	rep3	d1	11	812.317
control	F1	rep3	d1	12	842.539
control	F1	rep3	d1	13	732.387
control	F1	rep3	d1	14	770.114
control	F1	rep3	d1	15	818.87
control	F1	rep3	d1	16	773.831
control	F1	rep3	d1	17	834.812
control	F1	rep3	d1	18	836.229
control	F1	rep3	d1	19	663.091
control	F1	rep3	d1	20	698.154
control	F1	rep3	d1	21	931.149
control	F1	rep3	d1	22	745.736
control	F1	rep3	d1	23	834.933
control	F1	rep3	d1	24	945.551
control	F1	rep3	d1	25	858.774
control	F1	rep3	d1	26	703.998
control	F1	rep3	d1	27	811.314
control	F1	rep3	d1	28	797.328
control	F1	rep3	d1	29	829.433
control	F1	rep3	d1	30	849.801
control	F1	rep3	d1	31	843.663
control	F1	rep3	d1	32	768.402
control	F1	rep3	d1	33	927.017
control	F1	rep3	d1	34	628.2
control	F1	rep3	d1	35	590.129
control	F1	rep3	d1	36	801.632
control	F1	rep3	d1	37	604.409
control	F1	rep3	d1	38	832.097
control	F1	rep3	d1	39	836.938
control	F1	rep3	d1	40	837.647
control	F1	rep3	d1	41	802.928
control	F1	rep3	d1	42	686.051
control	F1	rep3	d1	43	839.653
control	F1	rep3	d1	44	788.648
control	F1	rep3	d1	45	860.608
control	F1	rep3	d1	46	817.158
control	F1	rep3	d1	47	852.93
control	F1	rep3	d1	48	842.417
postdauer	F1	rep3	d1	1	933.57
postdauer	F1	rep3	d1	2	717.813
postdauer	F1	rep3	d1	3	860.192
postdauer	F1	rep3	d1	4	875.891
postdauer	F1	rep3	d1	5	849.507
postdauer	F1	rep3	d1	6	870.168
postdauer	F1	rep3	d1	7	857.063
postdauer	F1	rep3	d1	8	874.301
postdauer	F1	rep3	d1	9	825.96
postdauer	F1	rep3	d1	10	801.166
postdauer	F1	rep3	d1	11	824.714
postdauer	F1	rep3	d1	12	865.033
postdauer	F1	rep3	d1	13	850.803
postdauer	F1	rep3	d1	14	953.988
postdauer	F1	rep3	d1	15	830.436
postdauer	F1	rep3	d1	16	847.38
postdauer	F1	rep3	d1	17	937.58
postdauer	F1	rep3	d1	18	902.933
postdauer	F1	rep3	d1	19	904.522
postdauer	F1	rep3	d1	20	878.433
postdauer	F1	rep3	d1	21	854.642
postdauer	F1	rep3	d1	22	883.861
postdauer	F1	rep3	d1	23	867.869
postdauer	F1	rep3	d1	24	890.536
postdauer	F1	rep3	d1	25	912.909
postdauer	F1	rep3	d1	26	872.002
postdauer	F1	rep3	d1	27	885.695
postdauer	F1	rep3	d1	28	904.522
postdauer	F1	rep3	d1	29	905.94
postdauer	F1	rep3	d1	30	875.182
postdauer	F1	rep3	d1	31	898.8
postdauer	F1	rep3	d1	32	868.163
postdauer	F1	rep3	d1	33	927.311
postdauer	F1	rep3	d1	34	866.745
postdauer	F1	rep3	d1	35	872.295
postdauer	F1	rep3	d1	36	837.819
postdauer	F1	rep3	d1	37	878.433
postdauer	F1	rep3	d1	38	867.332
postdauer	F1	rep3	d1	39	904.107
postdauer	F1	rep3	d1	40	926.895
postdauer	F1	rep3	d1	41	897.798
postdauer	F1	rep3	d1	42	822.881
postdauer	F1	rep3	d1	43	854.885
postdauer	F1	rep3	d1	44	875.891
postdauer	F1	rep3	d1	45	865.621
postdauer	F1	rep3	d1	46	847.502
postdauer	F1	rep3	d1	47	824.42
postdauer	F1	rep3	d1	48	769.698
postdauer	F1	rep3	d1	49	848.798
postdauer	F1	rep3	d1	50	842.073
postdauer	F1	rep3	d1	51	861.489
postdauer	F1	rep3	d1	52	829.677
postdauer	F1	rep3	d1	53	802.341
postdauer	F1	rep3	d1	54	921.932
postdauer	F1	rep3	d1	55	819.701
postdauer	F1	rep3	d1	56	887.822
postdauer	F1	rep3	d1	57	871.465
postdauer	F1	rep3	d1	58	817.452
postdauer	F1	rep3	d1	59	910.782
postdauer	F1	rep3	d1	60	864.74
postdauer	F1	rep3	d1	61	855.766
postdauer	F1	rep3	d1	62	849.801
postdauer	F1	rep3	d1	63	810.018
postdauer	F1	rep3	d1	64	925.771
postdauer	F1	rep3	d1	65	774.54
postdauer	F1	rep3	d1	66	892.663
postdauer	F1	rep3	d1	67	896.673
postdauer	F1	rep3	d1	68	822.708
postdauer	F1	rep3	d1	69	901.93
postdauer	F1	rep3	d1	70	901.515
postdauer	F1	rep3	d1	71	837.526
postdauer	F1	rep3	d1	72	901.515
postdauer	F1	rep3	d1	73	840.412
postdauer	F1	rep3	d1	74	921.467
postdauer	F1	rep3	d1	75	831.439
postdauer	F1	rep3	d1	76	913.374
postdauer	F1	rep3	d1	77	858.359
postdauer	F1	rep3	d1	78	933.033
postdauer	F1	rep3	d1	79	848.089
postdauer	F1	rep3	d1	80	913.79
control	F1	rep3	d8	1	382.746
control	F1	rep3	d8	2	401.081
control	F1	rep3	d8	3	359.258
control	F1	rep3	d8	4	372.981
control	F1	rep3	d8	5	368.099
control	F1	rep3	d8	6	361.255
control	F1	rep3	d8	7	317.348
control	F1	rep3	d8	8	373.487
control	F1	rep3	d8	9	341.577
control	F1	rep3	d8	10	451.955
control	F1	rep3	d8	11	476.306
control	F1	rep3	d8	12	479.34
control	F1	rep3	d8	13	456.689
control	F1	rep3	d8	14	324.82
control	F1	rep3	d8	15	203.013
control	F1	rep3	d8	16	416.383
control	F1	rep3	d8	17	333.661
control	F1	rep3	d8	18	340.923
control	F1	rep3	d8	19	269.693
control	F1	rep3	d8	20	436.505
control	F1	rep3	d8	21	229.177
control	F1	rep3	d8	22	303.477
control	F1	rep3	d8	23	298.743
control	F1	rep3	d8	24	553.788
control	F1	rep3	d8	25	457.552
control	F1	rep3	d8	26	596.98
control	F1	rep3	d8	27	380.157
control	F1	rep3	d8	28	498.155
control	F1	rep3	d8	29	498.007
control	F1	rep3	d8	30	423.349
control	F1	rep3	d8	31	193.248
control	F1	rep3	d8	32	426
control	F1	rep3	d8	33	319.371
control	F1	rep3	d8	34	501.965
control	F1	rep3	d8	35	456.331
control	F1	rep3	d8	36	492.348
postdauer	F1	rep3	d8	1	340.566
postdauer	F1	rep3	d8	2	508.364
postdauer	F1	rep3	d8	3	264.034
postdauer	F1	rep3	d8	4	233.406
postdauer	F1	rep3	d8	5	488.686
postdauer	F1	rep3	d8	6	328.569
postdauer	F1	rep3	d8	7	349.616
postdauer	F1	rep3	d8	8	464.284
postdauer	F1	rep3	d8	9	227.87
postdauer	F1	rep3	d8	10	233.135
postdauer	F1	rep3	d8	11	349.764
postdauer	F1	rep3	d8	12	219.325
postdauer	F1	rep3	d8	13	350.418
postdauer	F1	rep3	d8	14	224.652
postdauer	F1	rep3	d8	15	494.998
postdauer	F1	rep3	d8	16	555.514
postdauer	F1	rep3	d8	17	498.007
postdauer	F1	rep3	d8	18	548.88
postdauer	F1	rep3	d8	19	283.355
postdauer	F1	rep3	d8	20	349.851
postdauer	F1	rep3	d8	21	553.553
postdauer	F1	rep3	d8	22	523.395
postdauer	F1	rep3	d8	23	514.763
postdauer	F1	rep3	d8	24	310.086
postdauer	F1	rep3	d8	25	336.694
postdauer	F1	rep3	d8	26	360.75
postdauer	F1	rep3	d8	27	317.287
postdauer	F1	rep3	d8	28	527.414
postdauer	F1	rep3	d8	29	435.223
postdauer	F1	rep3	d8	30	317.052
postdauer	F1	rep3	d8	31	332.502
postdauer	F1	rep3	d8	32	260.581
postdauer	F1	rep3	d8	33	339.258
control	F1	LC10	d1	1	818.276
control	F1	LC10	d1	2	948.118
control	F1	LC10	d1	3	847.083
control	F1	LC10	d1	4	851.851
control	F1	LC10	d1	5	905.443
control	F1	LC10	d1	6	821.513
control	F1	LC10	d1	7	815.364
control	F1	LC10	d1	8	863.593
control	F1	LC10	d1	9	806.209
control	F1	LC10	d1	10	833.675
control	F1	LC10	d1	11	870.202
control	F1	LC10	d1	12	908.299
control	F1	LC10	d1	13	860.396
control	F1	LC10	d1	14	919.216
control	F1	LC10	d1	15	841.26
control	F1	LC10	d1	16	911.956
control	F1	LC10	d1	17	821.418
control	F1	LC10	d1	18	900.445
control	F1	LC10	d1	19	867.845
control	F1	LC10	d1	20	890.964
control	F1	LC10	d1	21	880.238
control	F1	LC10	d1	22	826.551
control	F1	LC10	d1	23	893.741
control	F1	LC10	d1	24	897.628
control	F1	LC10	d1	25	804.773
control	F1	LC10	d1	26	897.438
control	F1	LC10	d1	27	804.773
control	F1	LC10	d1	28	955.147
control	F1	LC10	d1	29	842.41
control	F1	LC10	d1	30	797.609
control	F1	LC10	d1	31	954.036
control	F1	LC10	d1	32	862.942
control	F1	LC10	d1	33	896.327
control	F1	LC10	d1	34	912.837
control	F1	LC10	d1	35	893.971
control	F1	LC10	d1	36	901.23
control	F1	LC10	d1	37	834.595
control	F1	LC10	d1	38	889.393
control	F1	LC10	d1	39	839.173
control	F1	LC10	d1	40	872.423
control	F1	LC10	d1	41	891.385
control	F1	LC10	d1	42	825.21
control	F1	LC10	d1	43	844.171
control	F1	LC10	d1	44	860.721
control	F1	LC10	d1	45	848.979
control	F1	LC10	d1	46	917.145
control	F1	LC10	d1	47	887.688
control	F1	LC10	d1	48	888.148
control	F1	LC10	d1	49	841.855
control	F1	LC10	d1	50	862.673
control	F1	LC10	d1	51	865.299
control	F1	LC10	d1	52	737.869
control	F1	LC10	d1	53	929.942
control	F1	LC10	d1	54	874.779
control	F1	LC10	d1	55	898.184
control	F1	LC10	d1	56	823.734
control	F1	LC10	d1	57	736.107
control	F1	LC10	d1	58	855.223
control	F1	LC10	d1	59	932.029
control	F1	LC10	d1	60	916.629
control	F1	LC10	d1	61	831.644
control	F1	LC10	d1	62	907.609
control	F1	LC10	d1	63	856.468
control	F1	LC10	d1	64	962.636
control	F1	LC10	d1	65	814.254
control	F1	LC10	d1	66	900.809
control	F1	LC10	d1	67	919.771
control	F1	LC10	d1	68	945.532
control	F1	LC10	d1	69	867.98
control	F1	LC10	d1	70	910.711
control	F1	LC10	d1	71	844.822
control	F1	LC10	d1	72	859.475
control	F1	LC10	d1	73	875.89
control	F1	LC10	d1	74	829.558
control	F1	LC10	d1	75	820.402
control	F1	LC10	d1	76	934.155
control	F1	LC10	d1	77	895.962
control	F1	LC10	d1	78	915.154
control	F1	LC10	d1	79	868.036
control	F1	LC10	d1	80	857.579
control	F1	LC10	d1	81	977.71
control	F1	LC10	d1	82	853.922
control	F1	LC10	d1	83	962.827
control	F1	LC10	d1	84	969.301
control	F1	LC10	d1	85	928.332
control	F1	LC10	d1	86	941.509
control	F1	LC10	d1	87	946.452
control	F1	LC10	d1	88	898.874
control	F1	LC10	d1	89	871.638
control	F1	LC10	d1	90	889.203
control	F1	LC10	d1	91	835.992
control	F1	LC10	d1	92	884.355
control	F1	LC10	d1	93	938.138
control	F1	LC10	d1	94	858.92
control	F1	LC10	d1	95	938.407
control	F1	LC10	d1	96	878.992
control	F1	LC10	d1	97	854.438
control	F1	LC10	d1	98	884.26
control	F1	LC10	d1	99	892.765
control	F1	LC10	d1	100	896.288
control	F1	LC10	d1	101	970.126
control	F1	LC10	d1	102	960.701
control	F1	LC10	d1	103	862.482
control	F1	LC10	d1	104	889.393
control	F1	LC10	d1	105	924.865
control	F1	LC10	d1	106	907.283
control	F1	LC10	d1	107	955.242
control	F1	LC10	d1	108	831.224
control	F1	LC10	d1	109	875.89
control	F1	LC10	d1	110	907.149
control	F1	LC10	d1	111	933.369
control	F1	LC10	d1	112	885.561
control	F1	LC10	d1	113	797.974
control	F1	LC10	d1	114	876.866
control	F1	LC10	d1	115	859.705
control	F1	LC10	d1	116	964.628
control	F1	LC10	d1	117	894.066
control	F1	LC10	d1	118	915.844
control	F1	LC10	d1	119	962.176
control	F1	LC10	d1	120	872.193
control	F1	LC10	d1	121	893.281
control	F1	LC10	d1	122	916.725
control	F1	LC10	d1	123	756.219
control	F1	LC10	d1	124	887.822
control	F1	LC10	d1	125	913.067
control	F1	LC10	d1	126	804.543
control	F1	LC10	d1	127	916.859
control	F1	LC10	d1	128	975.219
control	F1	LC10	d1	129	896.748
control	F1	LC10	d1	130	863.918
control	F1	LC10	d1	131	954.132
control	F1	LC10	d1	132	877.786
control	F1	LC10	d1	133	871.178
control	F1	LC10	d1	134	950.569
control	F1	LC10	d1	135	929.117
control	F1	LC10	d1	136	923.468
control	F1	LC10	d1	137	831.454
control	F1	LC10	d1	138	969.991
control	F1	LC10	d1	139	956.813
control	F1	LC10	d1	140	896.652
control	F1	LC10	d1	141	952.886
control	F1	LC10	d1	142	921.532
control	F1	LC10	d1	143	846.298
control	F1	LC10	d1	144	944.842
control	F1	LC10	d1	145	900.349
control	F1	LC10	d1	146	902.706
control	F1	LC10	d1	147	830.994
control	F1	LC10	d1	148	861.602
control	F1	LC10	d1	149	880.698
control	F1	LC10	d1	150	880.602
control	F1	LC10	d1	151	852.581
control	F1	LC10	d1	152	865.259
control	F1	LC10	d1	153	866.409
control	F1	LC10	d1	154	963.152
control	F1	LC10	d1	155	942.525
control	F1	LC10	d1	156	932.719
control	F1	LC10	d1	157	901.69
control	F1	LC10	d1	158	794.411
control	F1	LC10	d1	159	940.724
control	F1	LC10	d1	160	927.451
control	F1	LC10	d1	161	882.919
control	F1	LC10	d1	162	908.299
control	F1	LC10	d1	163	886.482
control	F1	LC10	d1	164	852.867
control	F1	LC10	d1	165	873.208
control	F1	LC10	d1	166	826.646
control	F1	LC10	d1	167	795.197
control	F1	LC10	d1	168	945.857
control	F1	LC10	d1	169	890.179
control	F1	LC10	d1	170	879.452
control	F1	LC10	d1	171	802.647
control	F1	LC10	d1	172	843.711
control	F1	LC10	d1	173	859.245
control	F1	LC10	d1	174	874.415
control	F1	LC10	d1	175	927.911
control	F1	LC10	d1	176	897.628
control	F1	LC10	d1	177	837.142
control	F1	LC10	d1	178	953.806
control	F1	LC10	d1	179	926.11
control	F1	LC10	d1	180	937.526
control	F1	LC10	d1	181	821.513
control	F1	LC10	d1	182	941.414
control	F1	LC10	d1	183	879.912
control	F1	LC10	d1	184	823.544
control	F1	LC10	d1	185	834.786
control	F1	LC10	d1	186	842.735
control	F1	LC10	d1	187	865.949
control	F1	LC10	d1	188	966.294
control	F1	LC10	d1	189	922.873
control	F1	LC10	d1	190	835.571
control	F1	LC10	d1	191	890.599
control	F1	LC10	d1	192	850.645
control	F1	LC10	d1	193	879.778
control	F1	LC10	d1	194	968.325
control	F1	LC10	d1	195	927.681
control	F1	LC10	d1	196	899.525
control	F1	LC10	d1	197	899.755
control	F1	LC10	d1	198	627.028
postdauer	F1	LC10	d1	1	866.83
postdauer	F1	LC10	d1	2	885.696
postdauer	F1	LC10	d1	3	903.222
postdauer	F1	LC10	d1	4	878.667
postdauer	F1	LC10	d1	5	922.357
postdauer	F1	LC10	d1	6	940.073
postdauer	F1	LC10	d1	7	879.778
postdauer	F1	LC10	d1	8	844.306
postdauer	F1	LC10	d1	9	709.656
postdauer	F1	LC10	d1	10	811.477
postdauer	F1	LC10	d1	11	735.552
postdauer	F1	LC10	d1	12	812.722
postdauer	F1	LC10	d1	13	720.613
postdauer	F1	LC10	d1	14	718.026
postdauer	F1	LC10	d1	15	694.027
postdauer	F1	LC10	d1	16	850.225
postdauer	F1	LC10	d1	17	848.328
postdauer	F1	LC10	d1	18	845.742
postdauer	F1	LC10	d1	19	950.799
postdauer	F1	LC10	d1	20	824.885
postdauer	F1	LC10	d1	21	846.528
postdauer	F1	LC10	d1	22	836.452
postdauer	F1	LC10	d1	23	874.089
postdauer	F1	LC10	d1	24	823.83
postdauer	F1	LC10	d1	25	945.072
postdauer	F1	LC10	d1	26	910.806
postdauer	F1	LC10	d1	27	823.639
postdauer	F1	LC10	d1	28	868.401
postdauer	F1	LC10	d1	29	881.023
postdauer	F1	LC10	d1	30	828.637
postdauer	F1	LC10	d1	31	856.468
postdauer	F1	LC10	d1	32	748.27
postdauer	F1	LC10	d1	33	871.082
postdauer	F1	LC10	d1	34	883.935
postdauer	F1	LC10	d1	35	711.553
postdauer	F1	LC10	d1	36	927.681
postdauer	F1	LC10	d1	37	861.792
postdauer	F1	LC10	d1	38	862.292
postdauer	F1	LC10	d1	39	861.141
postdauer	F1	LC10	d1	40	841.165
postdauer	F1	LC10	d1	41	867.52
postdauer	F1	LC10	d1	42	826.876
postdauer	F1	LC10	d1	43	806.804
postdauer	F1	LC10	d1	44	893.741
postdauer	F1	LC10	d1	45	741.7
postdauer	F1	LC10	d1	46	852.541
postdauer	F1	LC10	d1	47	836.031
postdauer	F1	LC10	d1	48	758.996
postdauer	F1	LC10	d1	49	842.831
postdauer	F1	LC10	d1	50	846.853
postdauer	F1	LC10	d1	51	949.229
postdauer	F1	LC10	d1	52	866.275
postdauer	F1	LC10	d1	53	853.462
postdauer	F1	LC10	d1	54	855.778
postdauer	F1	LC10	d1	55	850.32
postdauer	F1	LC10	d1	56	856.564
postdauer	F1	LC10	d1	57	933.925
postdauer	F1	LC10	d1	58	823.084
postdauer	F1	LC10	d1	59	847.868
postdauer	F1	LC10	d1	60	889.948
postdauer	F1	LC10	d1	61	802.091
postdauer	F1	LC10	d1	62	872.328
postdauer	F1	LC10	d1	63	816.705
postdauer	F1	LC10	d1	64	840.704
postdauer	F1	LC10	d1	65	841.165
postdauer	F1	LC10	d1	66	886.712
postdauer	F1	LC10	d1	67	767.596
postdauer	F1	LC10	d1	68	812.588
postdauer	F1	LC10	d1	69	859.245
postdauer	F1	LC10	d1	70	641.681
postdauer	F1	LC10	d1	71	824.845
postdauer	F1	LC10	d1	72	869.051
postdauer	F1	LC10	d1	73	826.551
postdauer	F1	LC10	d1	74	853.557
postdauer	F1	LC10	d1	75	873.113
postdauer	F1	LC10	d1	76	840.839
postdauer	F1	LC10	d1	77	738.003
postdauer	F1	LC10	d1	78	885.466
postdauer	F1	LC10	d1	79	746.048
postdauer	F1	LC10	d1	80	840.284
postdauer	F1	LC10	d1	81	843.981
postdauer	F1	LC10	d1	82	860.451
postdauer	F1	LC10	d1	83	856.564
postdauer	F1	LC10	d1	84	824.655
postdauer	F1	LC10	d1	85	920.747
postdauer	F1	LC10	d1	86	881.118
postdauer	F1	LC10	d1	87	867.941
postdauer	F1	LC10	d1	88	852.216
postdauer	F1	LC10	d1	89	542.637
postdauer	F1	LC10	d1	90	808.795
postdauer	F1	LC10	d1	91	762.233
postdauer	F1	LC10	d1	92	820.767
postdauer	F1	LC10	d1	93	848.654
postdauer	F1	LC10	d1	94	796.633
postdauer	F1	LC10	d1	95	841.815
postdauer	F1	LC10	d1	96	816.38
postdauer	F1	LC10	d1	97	844.171
postdauer	F1	LC10	d1	98	799.965
postdauer	F1	LC10	d1	99	842.275
postdauer	F1	LC10	d1	100	706.189
postdauer	F1	LC10	d1	101	826.646
postdauer	F1	LC10	d1	102	857.674
postdauer	F1	LC10	d1	103	827.201
postdauer	F1	LC10	d1	104	845.512
postdauer	F1	LC10	d1	105	848.098
postdauer	F1	LC10	d1	106	819.617
postdauer	F1	LC10	d1	107	673.035
postdauer	F1	LC10	d1	108	883.245
postdauer	F1	LC10	d1	109	841.165
postdauer	F1	LC10	d1	110	802.551
postdauer	F1	LC10	d1	111	808.335
postdauer	F1	LC10	d1	112	872.614
postdauer	F1	LC10	d1	113	850.225
postdauer	F1	LC10	d1	114	842.735
postdauer	F1	LC10	d1	115	854.898
postdauer	F1	LC10	d1	116	850.875
postdauer	F1	LC10	d1	117	669.798
postdauer	F1	LC10	d1	118	858.23
postdauer	F1	LC10	d1	119	893.741
postdauer	F1	LC10	d1	120	880.468
postdauer	F1	LC10	d1	121	856.794
postdauer	F1	LC10	d1	122	918.621
postdauer	F1	LC10	d1	123	853.327
postdauer	F1	LC10	d1	124	739.344
postdauer	F1	LC10	d1	125	589.66
postdauer	F1	LC10	d1	126	799.084
postdauer	F1	LC10	d1	127	648.71
postdauer	F1	LC10	d1	128	838.483
postdauer	F1	LC10	d1	129	845.187
postdauer	F1	LC10	d1	130	818.046
postdauer	F1	LC10	d1	131	835.207
postdauer	F1	LC10	d1	132	834.651
postdauer	F1	LC10	d1	133	844.862
postdauer	F1	LC10	d1	134	880.793
postdauer	F1	LC10	d1	135	906.689
postdauer	F1	LC10	d1	136	803.892
postdauer	F1	LC10	d1	137	839.038
postdauer	F1	LC10	d1	138	861.371
postdauer	F1	LC10	d1	139	860.586
postdauer	F1	LC10	d1	140	754.397
postdauer	F1	LC10	d1	141	799.965
postdauer	F1	LC10	d1	142	787.017
postdauer	F1	LC10	d1	143	827.011
postdauer	F1	LC10	d1	144	832.334
postdauer	F1	LC10	d1	145	837.372
postdauer	F1	LC10	d1	146	850.875
postdauer	F1	LC10	d1	147	867.06
postdauer	F1	LC10	d1	148	871.868
postdauer	F1	LC10	d1	149	852.311
postdauer	F1	LC10	d1	150	761.717
postdauer	F1	LC10	d1	151	869.742
postdauer	F1	LC10	d1	152	880.238
postdauer	F1	LC10	d1	153	854.438
postdauer	F1	LC10	d1	154	900.31
postdauer	F1	LC10	d1	155	872.328
postdauer	F1	LC10	d1	156	855.683
postdauer	F1	LC10	d1	157	860.165
postdauer	F1	LC10	d1	158	846.432
postdauer	F1	LC10	d1	159	823.314
postdauer	F1	LC10	d1	160	876.025
postdauer	F1	LC10	d1	161	894.431
postdauer	F1	LC10	d1	162	817.586
postdauer	F1	LC10	d1	163	765.7
postdauer	F1	LC10	d1	164	815.039
postdauer	F1	LC10	d1	165	889.528
postdauer	F1	LC10	d1	166	837.468
postdauer	F1	LC10	d1	167	854.017
postdauer	F1	LC10	d1	168	846.068
postdauer	F1	LC10	d1	169	819.291
postdauer	F1	LC10	d1	170	880.468
postdauer	F1	LC10	d1	171	857.214
postdauer	F1	LC10	d1	172	832.239
postdauer	F1	LC10	d1	173	859.015
postdauer	F1	LC10	d1	174	842.965
postdauer	F1	LC10	d1	175	816.61
postdauer	F1	LC10	d1	176	885.926
postdauer	F1	LC10	d1	177	919.501
postdauer	F1	LC10	d1	178	896.748
postdauer	F1	LC10	d1	179	894.161
postdauer	F1	LC10	d1	180	882.134
postdauer	F1	LC10	d1	181	854.533
postdauer	F1	LC10	d1	182	830.573
postdauer	F1	LC10	d1	183	800.425
postdauer	F1	LC10	d1	184	881.348
postdauer	F1	LC10	d1	185	890.179
postdauer	F1	LC10	d1	186	816.475
postdauer	F1	LC10	d1	187	803.202
postdauer	F1	LC10	d1	188	851.526
postdauer	F1	LC10	d1	189	883.379
postdauer	F1	LC10	d1	190	775.641
postdauer	F1	LC10	d1	191	973.783
postdauer	F1	LC10	d1	192	865.164
postdauer	F1	LC10	d1	193	869.281
postdauer	F1	LC10	d1	194	864.148
postdauer	F1	LC10	d1	195	826.321
postdauer	F1	LC10	d1	196	836.261
postdauer	F1	LC10	d1	197	721.493
postdauer	F1	LC10	d1	198	901.785
postdauer	F1	LC10	d1	199	828.082
postdauer	F1	LC10	d1	200	838.388
postdauer	F1	LC10	d1	201	825.765
postdauer	F1	LC10	d1	202	872.748
postdauer	F1	LC10	d1	203	908.029
postdauer	F1	LC10	d1	204	820.402
postdauer	F1	LC10	d1	205	879.222
postdauer	F1	LC10	d1	206	849.209
postdauer	F1	LC10	d1	207	772.174
postdauer	F1	LC10	d1	208	832.334
postdauer	F1	LC10	d1	209	922.318
postdauer	F1	LC10	d1	210	809.255
postdauer	F1	LC10	d1	211	868.401
postdauer	F1	LC10	d1	212	877.326
postdauer	F1	LC10	d1	213	841.49
postdauer	F1	LC10	d1	214	810.882
postdauer	F1	LC10	d1	215	868.171
postdauer	F1	LC10	d1	216	834.881
postdauer	F1	LC10	d1	217	871.217
postdauer	F1	LC10	d1	218	883.149
postdauer	F1	LC10	d1	219	861.141
postdauer	F1	LC10	d1	220	826.281
postdauer	F1	LC10	d1	221	831.588
postdauer	F1	LC10	d1	222	901.23
postdauer	F1	LC10	d1	223	883.839
postdauer	F1	LC10	d1	224	822.394
postdauer	F1	LC10	d1	225	868.075
postdauer	F1	LC10	d1	226	824.98
postdauer	F1	LC10	d1	227	833.025
postdauer	F1	LC10	d1	228	838.904
postdauer	F1	LC10	d1	229	853.327
postdauer	F1	LC10	d1	230	818.371
postdauer	F1	LC10	d1	231	920.057
postdauer	F1	LC10	d1	232	854.112
postdauer	F1	LC10	d1	233	902.801
postdauer	F1	LC10	d1	234	809.255
postdauer	F1	LC10	d1	235	837.237
postdauer	F1	LC10	d1	236	812.588
postdauer	F1	LC10	d1	237	864.053
postdauer	F1	LC10	d1	238	884.03
postdauer	F1	LC10	d1	239	827.566
postdauer	F1	LC10	d1	240	885.696
postdauer	F1	LC10	d1	241	817.07
postdauer	F1	LC10	d1	242	880.658
postdauer	F1	LC10	d1	243	911.496
postdauer	F1	LC10	d1	244	866.044
postdauer	F1	LC10	d1	245	942.199
postdauer	F1	LC10	d1	246	865.624
postdauer	F1	LC10	d1	247	800.521
postdauer	F1	LC10	d1	248	911.171
postdauer	F1	LC10	d1	249	841.26
postdauer	F1	LC10	d1	250	893.606
postdauer	F1	LC10	d1	251	883.57
postdauer	F1	LC10	d1	252	822.854
postdauer	F1	LC10	d1	253	757.004
postdauer	F1	LC10	d1	254	822.068
postdauer	F1	LC10	d1	255	861.927
postdauer	F1	LC10	d1	256	821.053
postdauer	F1	LC10	d1	257	858.269
postdauer	F1	LC10	d1	258	884.451
postdauer	F1	LC10	d1	259	872.978
postdauer	F1	LC10	d1	260	866.639
postdauer	F1	LC10	d1	261	876.215
postdauer	F1	LC10	d1	262	905.252
postdauer	F1	LC10	d1	263	806.344
postdauer	F1	LC10	d1	264	803.337
postdauer	F1	LC10	d1	265	888.282
postdauer	F1	LC10	d1	266	864.838
postdauer	F1	LC10	d1	267	875.66
postdauer	F1	LC10	d1	268	766.81
postdauer	F1	LC10	d1	269	861.697
postdauer	F1	LC10	d1	270	908.815
postdauer	F1	LC10	d1	271	831.779
postdauer	F1	LC10	d1	272	787.573
postdauer	F1	LC10	d1	273	868.21
postdauer	F1	LC10	d1	274	784.011
postdauer	F1	LC10	d1	275	780.869
postdauer	F1	LC10	d1	276	905.348
postdauer	F1	LC10	d1	277	855.453
postdauer	F1	LC10	d1	278	819.847
postdauer	F1	LC10	d1	279	881.444
postdauer	F1	LC10	d1	280	811.382
postdauer	F1	LC10	d1	281	864.148
postdauer	F1	LC10	d1	282	831.549
postdauer	F1	LC10	d1	283	835.667
postdauer	F1	LC10	d1	284	901.365
postdauer	F1	LC10	d1	285	873.764
postdauer	F1	LC10	d1	286	882.269
postdauer	F1	LC10	d1	287	840.284
postdauer	F1	LC10	d1	288	823.179
postdauer	F1	LC10	d1	289	934.25
postdauer	F1	LC10	d1	290	898.414
postdauer	F1	LC10	d1	291	859.245
postdauer	F1	LC10	d1	292	817.07
postdauer	F1	LC10	d1	293	873.534
postdauer	F1	LC10	d1	294	855.548
postdauer	F1	LC10	d1	295	868.956
postdauer	F1	LC10	d1	296	581.845
postdauer	F1	LC10	d1	297	844.401
postdauer	F1	LC10	d1	298	882.594
postdauer	F1	LC10	d1	299	788.684
postdauer	F1	LC10	d1	300	883.705
postdauer	F1	LC10	d1	301	840.839
postdauer	F1	LC10	d1	302	861.141
postdauer	F1	LC10	d1	303	823.274
postdauer	F1	LC10	d1	304	868.631
postdauer	F1	LC10	d1	305	775.736
postdauer	F1	LC10	d1	306	826.091
postdauer	F1	LC10	d1	307	840.474
postdauer	F1	LC10	d1	308	902.341
postdauer	F1	LC10	d1	309	751.967
postdauer	F1	LC10	d1	310	840.379
postdauer	F1	LC10	d1	311	417.413
postdauer	F1	LC10	d1	312	812.032
postdauer	F1	LC10	d1	313	765.24
postdauer	F1	LC10	d1	314	853.557
postdauer	F1	LC10	d1	315	846.623
postdauer	F1	LC10	d1	316	841.815
postdauer	F1	LC10	d1	317	856.468
postdauer	F1	LC10	d1	318	900.349
postdauer	F1	LC10	d1	319	868.496
postdauer	F1	LC10	d1	320	775.41
postdauer	F1	LC10	d1	321	895.637
postdauer	F1	LC10	d1	322	877.326
postdauer	F1	LC10	d1	323	866.83
postdauer	F1	LC10	d1	324	838.388
postdauer	F1	LC10	d1	325	894.391
postdauer	F1	LC10	d1	326	775.276
postdauer	F1	LC10	d1	327	804.543
postdauer	F1	LC10	d1	328	837.928
postdauer	F1	LC10	d1	329	835.476
postdauer	F1	LC10	d1	330	813.698
postdauer	F1	LC10	d1	331	796.363
postdauer	F1	LC10	d1	332	808.47
postdauer	F1	LC10	d1	333	857.119
postdauer	F1	LC10	d1	334	845.282
postdauer	F1	LC10	d1	335	878.112
control	F1	LC10	d8	1	702.072
control	F1	LC10	d8	2	656.985
control	F1	LC10	d8	3	597.015
control	F1	LC10	d8	4	597.149
control	F1	LC10	d8	5	619.768
control	F1	LC10	d8	6	559.972
control	F1	LC10	d8	7	569.453
control	F1	LC10	d8	8	647.139
control	F1	LC10	d8	9	679.183
control	F1	LC10	d8	10	712.663
control	F1	LC10	d8	11	541.431
control	F1	LC10	d8	12	566.637
control	F1	LC10	d8	13	632.391
control	F1	LC10	d8	14	628.829
control	F1	LC10	d8	15	536.068
control	F1	LC10	d8	16	579.489
control	F1	LC10	d8	17	675.946
control	F1	LC10	d8	18	685.887
control	F1	LC10	d8	19	648.71
control	F1	LC10	d8	20	612.874
control	F1	LC10	d8	21	574.451
control	F1	LC10	d8	22	565.891
control	F1	LC10	d8	23	570.238
control	F1	LC10	d8	24	566.081
control	F1	LC10	d8	25	471.655
control	F1	LC10	d8	26	684.642
control	F1	LC10	d8	27	646.029
control	F1	LC10	d8	28	492.283
control	F1	LC10	d8	29	541.201
control	F1	LC10	d8	30	575.467
control	F1	LC10	d8	31	569.318
control	F1	LC10	d8	32	582.401
control	F1	LC10	d8	33	638.999
control	F1	LC10	d8	34	347.962
control	F1	LC10	d8	35	496.995
control	F1	LC10	d8	36	604.274
control	F1	LC10	d8	37	619.808
control	F1	LC10	d8	38	363.916
control	F1	LC10	d8	39	456.256
control	F1	LC10	d8	40	460.604
control	F1	LC10	d8	41	694.487
control	F1	LC10	d8	42	646.584
control	F1	LC10	d8	43	512.854
control	F1	LC10	d8	44	588.51
control	F1	LC10	d8	45	646.909
control	F1	LC10	d8	46	657.08
control	F1	LC10	d8	47	721.819
control	F1	LC10	d8	48	652.828
control	F1	LC10	d8	49	639.785
control	F1	LC10	d8	50	640.666
control	F1	LC10	d8	51	414.271
control	F1	LC10	d8	52	629.614
control	F1	LC10	d8	53	606.075
control	F1	LC10	d8	54	609.637
control	F1	LC10	d8	55	681.54
control	F1	LC10	d8	56	694.947
control	F1	LC10	d8	57	597.245
control	F1	LC10	d8	58	494.409
control	F1	LC10	d8	59	688.664
control	F1	LC10	d8	60	673.17
control	F1	LC10	d8	61	595.904
control	F1	LC10	d8	62	643.577
control	F1	LC10	d8	63	706.189
control	F1	LC10	d8	64	661.983
control	F1	LC10	d8	65	574.911
control	F1	LC10	d8	66	636.318
control	F1	LC10	d8	67	607.836
control	F1	LC10	d8	68	474.892
control	F1	LC10	d8	69	592.437
control	F1	LC10	d8	70	598.355
control	F1	LC10	d8	71	618.792
control	F1	LC10	d8	72	528.158
control	F1	LC10	d8	73	678.858
control	F1	LC10	d8	74	427.774
control	F1	LC10	d8	75	577.593
control	F1	LC10	d8	76	663.094
control	F1	LC10	d8	77	606.63
control	F1	LC10	d8	78	582.726
control	F1	LC10	d8	79	690.751
control	F1	LC10	d8	80	666.236
control	F1	LC10	d8	81	645.243
control	F1	LC10	d8	82	632.621
control	F1	LC10	d8	83	639.19
control	F1	LC10	d8	84	620.689
control	F1	LC10	d8	85	577.823
control	F1	LC10	d8	86	745.723
control	F1	LC10	d8	87	619.348
control	F1	LC10	d8	88	614.77
control	F1	LC10	d8	89	477.344
control	F1	LC10	d8	90	541.527
control	F1	LC10	d8	91	532.276
control	F1	LC10	d8	92	566.081
control	F1	LC10	d8	93	624.251
control	F1	LC10	d8	94	624.576
control	F1	LC10	d8	95	664.53
control	F1	LC10	d8	96	705.864
control	F1	LC10	d8	97	699.62
control	F1	LC10	d8	98	646.029
control	F1	LC10	d8	99	558.171
control	F1	LC10	d8	100	581.845
control	F1	LC10	d8	101	620.554
control	F1	LC10	d8	102	685.197
control	F1	LC10	d8	103	577.038
control	F1	LC10	d8	104	621.244
control	F1	LC10	d8	105	625.496
control	F1	LC10	d8	106	648.575
control	F1	LC10	d8	107	659.857
control	F1	LC10	d8	108	521.455
control	F1	LC10	d8	109	494.964
control	F1	LC10	d8	110	626.052
control	F1	LC10	d8	111	637.984
control	F1	LC10	d8	112	594.333
control	F1	LC10	d8	113	686.673
control	F1	LC10	d8	114	604.829
control	F1	LC10	d8	115	627.488
control	F1	LC10	d8	116	608.852
control	F1	LC10	d8	117	662.864
control	F1	LC10	d8	118	522.105
postdauer	F1	LC10	d8	1	473.551
postdauer	F1	LC10	d8	2	482.477
postdauer	F1	LC10	d8	3	337.926
postdauer	F1	LC10	d8	4	448.997
postdauer	F1	LC10	d8	5	448.767
postdauer	F1	LC10	d8	6	567.747
postdauer	F1	LC10	d8	7	480.255
postdauer	F1	LC10	d8	8	491.632
postdauer	F1	LC10	d8	9	508.927
postdauer	F1	LC10	d8	10	343.614
postdauer	F1	LC10	d8	11	524.787
postdauer	F1	LC10	d8	12	474.892
postdauer	F1	LC10	d8	13	508.832
postdauer	F1	LC10	d8	14	420.65
postdauer	F1	LC10	d8	15	478.454
postdauer	F1	LC10	d8	16	567.882
postdauer	F1	LC10	d8	17	447.981
postdauer	F1	LC10	d8	18	330.436
postdauer	F1	LC10	d8	19	219.691
postdauer	F1	LC10	d8	20	446.64
postdauer	F1	LC10	d8	21	416.397
postdauer	F1	LC10	d8	22	569.874
postdauer	F1	LC10	d8	23	574.031
postdauer	F1	LC10	d8	24	592.342
postdauer	F1	LC10	d8	25	466.522
postdauer	F1	LC10	d8	26	449.647
postdauer	F1	LC10	d8	27	412.605
postdauer	F1	LC10	d8	28	520.534
postdauer	F1	LC10	d8	29	595.809
postdauer	F1	LC10	d8	30	594.008
postdauer	F1	LC10	d8	31	535.053
postdauer	F1	LC10	d8	32	410.019
postdauer	F1	LC10	d8	33	516.742
postdauer	F1	LC10	d8	34	455.24
control	F1	LC11	d1	1	753.633
control	F1	LC11	d1	2	730.419
control	F1	LC11	d1	3	771.293
control	F1	LC11	d1	4	771.658
control	F1	LC11	d1	5	741.01
control	F1	LC11	d1	6	772.729
control	F1	LC11	d1	7	697.589
control	F1	LC11	d1	8	712.338
control	F1	LC11	d1	9	691.576
control	F1	LC11	d1	10	737.353
control	F1	LC11	d1	11	783.685
control	F1	LC11	d1	12	762.137
control	F1	LC11	d1	13	736.107
control	F1	LC11	d1	14	765.374
control	F1	LC11	d1	15	745.397
control	F1	LC11	d1	16	741.24
control	F1	LC11	d1	17	722.144
control	F1	LC11	d1	18	779.663
control	F1	LC11	d1	19	734.211
control	F1	LC11	d1	20	743.271
control	F1	LC11	d1	21	704.389
control	F1	LC11	d1	22	721.168
control	F1	LC11	d1	23	741.93
control	F1	LC11	d1	24	741.605
control	F1	LC11	d1	25	725.746
control	F1	LC11	d1	26	779.433
control	F1	LC11	d1	27	731.204
control	F1	LC11	d1	28	673.82
control	F1	LC11	d1	29	718.391
control	F1	LC11	d1	30	782.44
control	F1	LC11	d1	31	768.421
control	F1	LC11	d1	32	772.499
control	F1	LC11	d1	33	821.513
control	F1	LC11	d1	34	711.743
control	F1	LC11	d1	35	699.16
control	F1	LC11	d1	36	727.507
control	F1	LC11	d1	37	663.784
control	F1	LC11	d1	38	750.07
control	F1	LC11	d1	39	763.248
control	F1	LC11	d1	40	784.756
control	F1	LC11	d1	41	778.092
control	F1	LC11	d1	42	769.167
control	F1	LC11	d1	43	752.427
control	F1	LC11	d1	44	727.602
control	F1	LC11	d1	45	698.7
control	F1	LC11	d1	46	741.835
control	F1	LC11	d1	47	775.18
control	F1	LC11	d1	48	759.686
control	F1	LC11	d1	49	800.29
control	F1	LC11	d1	50	772.078
control	F1	LC11	d1	51	759.456
control	F1	LC11	d1	52	726.952
control	F1	LC11	d1	53	767.921
control	F1	LC11	d1	54	749.15
control	F1	LC11	d1	55	760.107
control	F1	LC11	d1	56	669.703
control	F1	LC11	d1	57	747.484
control	F1	LC11	d1	58	776.426
control	F1	LC11	d1	59	788.128
control	F1	LC11	d1	60	742.676
control	F1	LC11	d1	61	739.479
control	F1	LC11	d1	62	730.514
control	F1	LC11	d1	63	836.261
control	F1	LC11	d1	64	762.463
control	F1	LC11	d1	65	747.389
control	F1	LC11	d1	66	753.537
control	F1	LC11	d1	67	798.434
control	F1	LC11	d1	68	747.294
control	F1	LC11	d1	69	783.55
control	F1	LC11	d1	70	737.448
control	F1	LC11	d1	71	732.315
control	F1	LC11	d1	72	758.345
control	F1	LC11	d1	73	693.242
control	F1	LC11	d1	74	734.346
control	F1	LC11	d1	75	778.552
control	F1	LC11	d1	76	740.13
control	F1	LC11	d1	77	711.227
control	F1	LC11	d1	78	705.959
postdauer	F1	LC11	d1	1	704.849
postdauer	F1	LC11	d1	2	686.308
postdauer	F1	LC11	d1	3	710.767
postdauer	F1	LC11	d1	4	762.828
postdauer	F1	LC11	d1	5	693.377
postdauer	F1	LC11	d1	6	725.056
postdauer	F1	LC11	d1	7	678.953
postdauer	F1	LC11	d1	8	711.188
postdauer	F1	LC11	d1	9	772.634
postdauer	F1	LC11	d1	10	678.073
postdauer	F1	LC11	d1	11	618.792
postdauer	F1	LC11	d1	12	737.908
postdauer	F1	LC11	d1	13	714.234
postdauer	F1	LC11	d1	14	767.366
postdauer	F1	LC11	d1	15	743.041
postdauer	F1	LC11	d1	16	779.988
postdauer	F1	LC11	d1	17	713.449
postdauer	F1	LC11	d1	18	713.219
postdauer	F1	LC11	d1	19	746.373
postdauer	F1	LC11	d1	20	665.91
postdauer	F1	LC11	d1	21	711.132
postdauer	F1	LC11	d1	22	674.185
postdauer	F1	LC11	d1	23	666.886
postdauer	F1	LC11	d1	24	685.332
postdauer	F1	LC11	d1	25	735.417
postdauer	F1	LC11	d1	26	715.766
postdauer	F1	LC11	d1	27	699.065
postdauer	F1	LC11	d1	28	719.732
postdauer	F1	LC11	d1	29	632.295
postdauer	F1	LC11	d1	30	687.419
postdauer	F1	LC11	d1	31	683.856
postdauer	F1	LC11	d1	32	741.28
postdauer	F1	LC11	d1	33	674.97
postdauer	F1	LC11	d1	34	505.23
postdauer	F1	LC11	d1	35	645.799
postdauer	F1	LC11	d1	36	751.967
postdauer	F1	LC11	d1	37	726.857
postdauer	F1	LC11	d1	38	681.54
postdauer	F1	LC11	d1	39	734.116
postdauer	F1	LC11	d1	40	733.1
postdauer	F1	LC11	d1	41	662.443
postdauer	F1	LC11	d1	42	761.543
postdauer	F1	LC11	d1	43	726.627
postdauer	F1	LC11	d1	44	749.19
postdauer	F1	LC11	d1	45	759.972
postdauer	F1	LC11	d1	46	726.857
postdauer	F1	LC11	d1	47	690.695
postdauer	F1	LC11	d1	48	723.85
postdauer	F1	LC11	d1	49	687.649
postdauer	F1	LC11	d1	50	755.434
postdauer	F1	LC11	d1	51	727.507
postdauer	F1	LC11	d1	52	758.805
postdauer	F1	LC11	d1	53	713.544
postdauer	F1	LC11	d1	54	692.916
postdauer	F1	LC11	d1	55	747.159
postdauer	F1	LC11	d1	56	724.175
postdauer	F1	LC11	d1	57	617.642
postdauer	F1	LC11	d1	58	709.656
postdauer	F1	LC11	d1	59	742.351
control	F1	LC11	d8	1	639.42
control	F1	LC11	d8	2	636.413
control	F1	LC11	d8	3	671.369
control	F1	LC11	d8	4	589.2
control	F1	LC11	d8	5	702.953
control	F1	LC11	d8	6	648.25
control	F1	LC11	d8	7	685.332
control	F1	LC11	d8	8	742.906
control	F1	LC11	d8	9	701.516
control	F1	LC11	d8	10	567.652
control	F1	LC11	d8	11	669.568
control	F1	LC11	d8	12	688.989
control	F1	LC11	d8	13	642.466
control	F1	LC11	d8	14	628.598
control	F1	LC11	d8	15	606.821
control	F1	LC11	d8	16	704.658
control	F1	LC11	d8	17	687.093
control	F1	LC11	d8	18	678.953
control	F1	LC11	d8	19	739.709
control	F1	LC11	d8	20	657.961
control	F1	LC11	d8	21	671.139
control	F1	LC11	d8	22	606.495
control	F1	LC11	d8	23	684.412
control	F1	LC11	d8	24	616.992
control	F1	LC11	d8	25	665.68
control	F1	LC11	d8	26	679.413
control	F1	LC11	d8	27	574.126
control	F1	LC11	d8	28	727.182
control	F1	LC11	d8	29	672.709
control	F1	LC11	d8	30	622.029
control	F1	LC11	d8	31	698.605
control	F1	LC11	d8	32	664.57
control	F1	LC11	d8	33	730.189
control	F1	LC11	d8	34	605.94
control	F1	LC11	d8	35	648.71
control	F1	LC11	d8	36	443.078
control	F1	LC11	d8	37	598.125
control	F1	LC11	d8	38	597.665
control	F1	LC11	d8	39	532.371
control	F1	LC11	d8	40	682.746
control	F1	LC11	d8	41	648.575
control	F1	LC11	d8	42	640.761
control	F1	LC11	d8	43	573.015
control	F1	LC11	d8	44	651.812
control	F1	LC11	d8	45	649.591
control	F1	LC11	d8	46	669.473
control	F1	LC11	d8	47	627.718
control	F1	LC11	d8	48	624.806
control	F1	LC11	d8	49	604.599
control	F1	LC11	d8	50	619.443
control	F1	LC11	d8	51	618.007
postdauer	F1	LC11	d8	1	310.229
postdauer	F1	LC11	d8	2	250.394
postdauer	F1	LC11	d8	3	270.601
postdauer	F1	LC11	d8	4	233.654
control	F1	LC12	d1	1	869.837
control	F1	LC12	d1	2	866.6
control	F1	LC12	d1	3	879.087
control	F1	LC12	d1	4	892.495
control	F1	LC12	d1	5	869.186
control	F1	LC12	d1	6	866.275
control	F1	LC12	d1	7	805.328
control	F1	LC12	d1	8	890.504
control	F1	LC12	d1	9	827.987
control	F1	LC12	d1	10	838.348
control	F1	LC12	d1	11	840.379
control	F1	LC12	d1	12	885.466
control	F1	LC12	d1	13	865.814
control	F1	LC12	d1	14	861.332
control	F1	LC12	d1	15	838.118
control	F1	LC12	d1	16	881.578
control	F1	LC12	d1	17	832.564
control	F1	LC12	d1	18	847.543
control	F1	LC12	d1	19	863.823
control	F1	LC12	d1	20	826.416
control	F1	LC12	d1	21	886.712
control	F1	LC12	d1	22	867.06
control	F1	LC12	d1	23	848.194
control	F1	LC12	d1	24	799.084
control	F1	LC12	d1	25	840.934
control	F1	LC12	d1	26	853.787
control	F1	LC12	d1	27	832.009
control	F1	LC12	d1	28	878.207
control	F1	LC12	d1	29	805.979
control	F1	LC12	d1	30	880.468
control	F1	LC12	d1	31	844.727
control	F1	LC12	d1	32	840.704
control	F1	LC12	d1	33	848.328
control	F1	LC12	d1	34	871.082
control	F1	LC12	d1	35	840.054
control	F1	LC12	d1	36	883.054
control	F1	LC12	d1	37	885.371
control	F1	LC12	d1	38	824.194
control	F1	LC12	d1	39	855.548
control	F1	LC12	d1	40	853.001
control	F1	LC12	d1	41	825.995
control	F1	LC12	d1	42	871.082
control	F1	LC12	d1	43	843.711
control	F1	LC12	d1	44	851.891
control	F1	LC12	d1	45	816.285
control	F1	LC12	d1	46	803.107
control	F1	LC12	d1	47	835.016
control	F1	LC12	d1	48	876.215
control	F1	LC12	d1	49	831.779
control	F1	LC12	d1	50	892.4
control	F1	LC12	d1	51	824.099
control	F1	LC12	d1	52	845.092
control	F1	LC12	d1	53	764.359
control	F1	LC12	d1	54	866.409
control	F1	LC12	d1	55	803.432
control	F1	LC12	d1	56	860.031
control	F1	LC12	d1	57	860.681
control	F1	LC12	d1	58	826.781
control	F1	LC12	d1	59	915.289
control	F1	LC12	d1	60	847.964
control	F1	LC12	d1	61	806.899
control	F1	LC12	d1	62	792.055
control	F1	LC12	d1	63	850.225
control	F1	LC12	d1	64	868.496
control	F1	LC12	d1	65	827.987
control	F1	LC12	d1	66	875.565
control	F1	LC12	d1	67	843.846
control	F1	LC12	d1	68	842.601
control	F1	LC12	d1	69	875.43
control	F1	LC12	d1	70	698.375
control	F1	LC12	d1	71	856.468
control	F1	LC12	d1	72	841.49
control	F1	LC12	d1	73	828.542
control	F1	LC12	d1	74	821.188
control	F1	LC12	d1	75	872.614
control	F1	LC12	d1	76	886.482
postdauer	F1	LC12	d1	1	826.455
postdauer	F1	LC12	d1	2	861.602
postdauer	F1	LC12	d1	3	835.706
postdauer	F1	LC12	d1	4	826.876
postdauer	F1	LC12	d1	5	815.364
postdauer	F1	LC12	d1	6	683.301
postdauer	F1	LC12	d1	7	862.808
postdauer	F1	LC12	d1	8	807.78
postdauer	F1	LC12	d1	9	816.61
postdauer	F1	LC12	d1	10	721.914
postdauer	F1	LC12	d1	11	772.729
postdauer	F1	LC12	d1	12	874.089
postdauer	F1	LC12	d1	13	858.46
postdauer	F1	LC12	d1	14	819.387
postdauer	F1	LC12	d1	15	822.068
postdauer	F1	LC12	d1	16	844.076
postdauer	F1	LC12	d1	17	761.122
postdauer	F1	LC12	d1	18	756.314
postdauer	F1	LC12	d1	19	816.84
postdauer	F1	LC12	d1	20	733.56
postdauer	F1	LC12	d1	21	744.707
postdauer	F1	LC12	d1	22	872.288
postdauer	F1	LC12	d1	23	718.352
postdauer	F1	LC12	d1	24	856.564
postdauer	F1	LC12	d1	25	805.138
postdauer	F1	LC12	d1	26	777.441
postdauer	F1	LC12	d1	27	823.044
postdauer	F1	LC12	d1	28	749.515
postdauer	F1	LC12	d1	29	824.75
postdauer	F1	LC12	d1	30	835.151
postdauer	F1	LC12	d1	31	841.03
postdauer	F1	LC12	d1	32	830.534
postdauer	F1	LC12	d1	33	878.437
postdauer	F1	LC12	d1	34	868.401
postdauer	F1	LC12	d1	35	907.704
postdauer	F1	LC12	d1	36	819.061
postdauer	F1	LC12	d1	37	818.641
postdauer	F1	LC12	d1	38	817.625
postdauer	F1	LC12	d1	39	807.684
postdauer	F1	LC12	d1	40	802.187
postdauer	F1	LC12	d1	41	840.379
postdauer	F1	LC12	d1	42	689.449
postdauer	F1	LC12	d1	43	846.623
postdauer	F1	LC12	d1	44	854.438
postdauer	F1	LC12	d1	45	770.373
postdauer	F1	LC12	d1	46	845.972
postdauer	F1	LC12	d1	47	824.099
postdauer	F1	LC12	d1	48	718.677
postdauer	F1	LC12	d1	49	686.768
postdauer	F1	LC12	d1	50	728.753
postdauer	F1	LC12	d1	51	687.093
postdauer	F1	LC12	d1	52	819.387
postdauer	F1	LC12	d1	53	887.632
postdauer	F1	LC12	d1	54	826.321
postdauer	F1	LC12	d1	55	851.431
postdauer	F1	LC12	d1	56	872.558
postdauer	F1	LC12	d1	57	758.44
postdauer	F1	LC12	d1	58	777.307
postdauer	F1	LC12	d1	59	846.988
postdauer	F1	LC12	d1	60	762.788
postdauer	F1	LC12	d1	61	792.151
postdauer	F1	LC12	d1	62	876.215
postdauer	F1	LC12	d1	63	845.052
postdauer	F1	LC12	d1	64	841.299
postdauer	F1	LC12	d1	65	848.654
postdauer	F1	LC12	d1	66	828.122
postdauer	F1	LC12	d1	67	897.303
postdauer	F1	LC12	d1	68	840.054
postdauer	F1	LC12	d1	69	821.053
postdauer	F1	LC12	d1	70	873.994
postdauer	F1	LC12	d1	71	822.528
postdauer	F1	LC12	d1	72	820.307
postdauer	F1	LC12	d1	73	862.942
postdauer	F1	LC12	d1	74	784.701
postdauer	F1	LC12	d1	75	806.764
postdauer	F1	LC12	d1	76	741.774
postdauer	F1	LC12	d1	77	774.395
postdauer	F1	LC12	d1	78	802.551
postdauer	F1	LC12	d1	79	695.368
postdauer	F1	LC12	d1	80	1010.31
postdauer	F1	LC12	d1	81	824.98
postdauer	F1	LC12	d1	82	796.403
postdauer	F1	LC12	d1	83	826.321
postdauer	F1	LC12	d1	84	880.563
postdauer	F1	LC12	d1	85	821.743
control	F1	LC12	d8	1	612.089
control	F1	LC12	d8	2	614.77
control	F1	LC12	d8	3	667.346
control	F1	LC12	d8	4	609.637
control	F1	LC12	d8	5	629.519
control	F1	LC12	d8	6	519.558
control	F1	LC12	d8	7	610.843
control	F1	LC12	d8	8	638.999
control	F1	LC12	d8	9	629.939
control	F1	LC12	d8	10	618.332
control	F1	LC12	d8	11	649.036
control	F1	LC12	d8	12	671.694
control	F1	LC12	d8	13	678.858
control	F1	LC12	d8	14	668.227
control	F1	LC12	d8	15	536.624
control	F1	LC12	d8	16	611.533
control	F1	LC12	d8	17	612.184
control	F1	LC12	d8	18	715.9
control	F1	LC12	d8	19	680.619
control	F1	LC12	d8	20	602.148
control	F1	LC12	d8	21	608.526
control	F1	LC12	d8	22	699.486
control	F1	LC12	d8	23	549.341
control	F1	LC12	d8	24	607.606
control	F1	LC12	d8	25	666.101
control	F1	LC12	d8	26	650.606
control	F1	LC12	d8	27	569.453
control	F1	LC12	d8	28	528.119
control	F1	LC12	d8	29	673.265
control	F1	LC12	d8	30	615.555
control	F1	LC12	d8	31	658.976
control	F1	LC12	d8	32	635.072
control	F1	LC12	d8	33	554.244
control	F1	LC12	d8	34	610.652
control	F1	LC12	d8	35	624.711
control	F1	LC12	d8	36	627.718
control	F1	LC12	d8	37	529.594
control	F1	LC12	d8	38	543.098
control	F1	LC12	d8	39	660.642
control	F1	LC12	d8	40	600.807
control	F1	LC12	d8	41	626.472
control	F1	LC12	d8	42	621.244
control	F1	LC12	d8	43	649.821
control	F1	LC12	d8	44	643.672
control	F1	LC12	d8	45	655.279
control	F1	LC12	d8	46	596.459
control	F1	LC12	d8	47	629.844
control	F1	LC12	d8	48	651.812
control	F1	LC12	d8	49	674.05
control	F1	LC12	d8	50	681.31
control	F1	LC12	d8	51	628.503
control	F1	LC12	d8	52	633.502
control	F1	LC12	d8	53	548.556
control	F1	LC12	d8	54	648.25
control	F1	LC12	d8	55	691.806
control	F1	LC12	d8	56	646.679
control	F1	LC12	d8	57	567.192
control	F1	LC12	d8	58	619.673
control	F1	LC12	d8	59	630.074
control	F1	LC12	d8	60	551.888
control	F1	LC12	d8	61	625.496
control	F1	LC12	d8	62	704.983
control	F1	LC12	d8	63	592.112
control	F1	LC12	d8	64	682.516
control	F1	LC12	d8	65	567.097
control	F1	LC12	d8	66	588.224
control	F1	LC12	d8	67	580.045
control	F1	LC12	d8	68	621.474
control	F1	LC12	d8	69	631.145
control	F1	LC12	d8	70	648.02
control	F1	LC12	d8	71	592.532
control	F1	LC12	d8	72	559.838
control	F1	LC12	d8	73	615.555
control	F1	LC12	d8	74	618.237
control	F1	LC12	d8	75	691.116
control	F1	LC12	d8	76	715.02
control	F1	LC12	d8	77	589.66
control	F1	LC12	d8	78	647.465
control	F1	LC12	d8	79	602.608
control	F1	LC12	d8	80	632.526
control	F1	LC12	d8	81	605.48
control	F1	LC12	d8	82	557.386
control	F1	LC12	d8	83	608.296
control	F1	LC12	d8	84	675.026
control	F1	LC12	d8	85	701.286
control	F1	LC12	d8	86	560.393
control	F1	LC12	d8	87	600.156
control	F1	LC12	d8	88	661.198
control	F1	LC12	d8	89	560.393
control	F1	LC12	d8	90	628.138
control	F1	LC12	d8	91	719.042
postdauer	F1	LC12	d8	1	640.205
postdauer	F1	LC12	d8	2	553.268
postdauer	F1	LC12	d8	3	658.516
postdauer	F1	LC12	d8	4	486.269
postdauer	F1	LC12	d8	5	630.074
postdauer	F1	LC12	d8	6	611.763
postdauer	F1	LC12	d8	7	571.77
postdauer	F1	LC12	d8	8	667.672
postdauer	F1	LC12	d8	9	571.77
postdauer	F1	LC12	d8	10	599.466
postdauer	F1	LC12	d8	11	470.314
postdauer	F1	LC12	d8	12	672.709
postdauer	F1	LC12	d8	13	406.782
postdauer	F1	LC12	d8	14	633.176
postdauer	F1	LC12	d8	15	627.162
postdauer	F1	LC12	d8	16	600.156
postdauer	F1	LC12	d8	17	571.905
postdauer	F1	LC12	d8	18	387.59
postdauer	F1	LC12	d8	19	616.301
postdauer	F1	LC12	d8	20	605.94
postdauer	F1	LC12	d8	21	647.139
postdauer	F1	LC12	d8	22	601.362
postdauer	F1	LC12	d8	23	579.719
postdauer	F1	LC12	d8	24	294.6
postdauer	F1	LC12	d8	25	651.257
postdauer	F1	LC12	d8	26	641.546
postdauer	F1	LC12	d8	27	584.527
postdauer	F1	LC12	d8	28	565.756
postdauer	F1	LC12	d8	29	444.514
postdauer	F1	LC12	d8	30	573.111
postdauer	F1	LC12	d8	31	614.54
postdauer	F1	LC12	d8	32	601.592
postdauer	F1	LC12	d8	33	600.252
postdauer	F1	LC12	d8	34	657.866
postdauer	F1	LC12	d8	35	660.642
postdauer	F1	LC12	d8	36	647.599
postdauer	F1	LC12	d8	37	683.206
postdauer	F1	LC12	d8	38	566.867
postdauer	F1	LC12	d8	39	421.3
postdauer	F1	LC12	d8	40	680.429
postdauer	F1	LC12	d8	41	595.579
postdauer	F1	LC12	d8	42	661.198
postdauer	F1	LC12	d8	43	602.378
postdauer	F1	LC12	d8	44	620.689
postdauer	F1	LC12	d8	45	611.763
postdauer	F1	LC12	d8	46	574.816
postdauer	F1	LC12	d8	47	693.567
postdauer	F1	LC12	d8	48	639.555
postdauer	F1	LC12	d8	49	612.414
postdauer	F1	LC12	d8	50	604.734
postdauer	F1	LC12	d8	51	564.645
postdauer	F1	LC12	d8	52	559.608
postdauer	F1	LC12	d8	53	584.067
postdauer	F1	LC12	d8	54	579.489
postdauer	F1	LC12	d8	55	593.778
postdauer	F1	LC12	d8	56	635.302
postdauer	F1	LC12	d8	57	362.385
postdauer	F1	LC12	d8	58	679.739
postdauer	F1	LC12	d8	59	539.631
postdauer	F1	LC12	d8	60	622.68
postdauer	F1	LC12	d8	61	591.326
postdauer	F1	LC12	d8	62	635.302
postdauer	F1	LC12	d8	63	444.839
postdauer	F1	LC12	d8	64	600.807
postdauer	F1	LC12	d8	65	603.163
postdauer	F1	LC12	d8	66	683.626
postdauer	F1	LC12	d8	67	452.559
postdauer	F1	LC12	d8	68	648.48
postdauer	F1	LC12	d8	69	597.11
postdauer	F1	LC12	d8	70	627.583
postdauer	F1	LC12	d8	71	591.651
postdauer	F1	LC12	d8	72	541.336
postdauer	F1	LC12	d8	73	223.483
postdauer	F1	LC12	d8	74	639.555
postdauer	F1	LC12	d8	75	672.805
postdauer	F1	LC12	d8	76	559.512
postdauer	F1	LC12	d8	77	648.48
postdauer	F1	LC12	d8	78	628.368
postdauer	F1	LC12	d8	79	590.406
postdauer	F1	LC12	d8	80	606.495
postdauer	F1	LC12	d8	81	596.459
postdauer	F1	LC12	d8	82	625.822
postdauer	F1	LC12	d8	83	575.007
postdauer	F1	LC12	d8	84	642.236
postdauer	F1	LC12	d8	85	578.934
postdauer	F1	LC12	d8	86	567.327
postdauer	F1	LC12	d8	87	670.909
postdauer	F1	LC12	d8	88	614.445
postdauer	F1	LC12	d8	89	478.224
postdauer	F1	LC12	d8	90	682.19
postdauer	F1	LC12	d8	91	604.599
postdauer	F1	LC12	d8	92	629.289
postdauer	F1	LC12	d8	93	595.214
postdauer	F1	LC12	d8	94	686.673
postdauer	F1	LC12	d8	95	635.532
postdauer	F1	LC12	d8	96	663.689
postdauer	F1	LC12	d8	97	616.666
postdauer	F1	LC12	d8	98	558.402
postdauer	F1	LC12	d8	99	668.362
postdauer	F1	LC12	d8	100	579.354
postdauer	F1	LC12	d8	101	619.673
control	F1	LC14	d1	1	878.437
control	F1	LC14	d1	2	915.614
control	F1	LC14	d1	3	878.016
control	F1	LC14	d1	4	896.058
control	F1	LC14	d1	5	866.044
control	F1	LC14	d1	6	827.987
control	F1	LC14	d1	7	739.574
control	F1	LC14	d1	8	908.489
control	F1	LC14	d1	9	896.748
control	F1	LC14	d1	10	845.052
control	F1	LC14	d1	11	842.045
control	F1	LC14	d1	12	937.622
control	F1	LC14	d1	13	832.334
control	F1	LC14	d1	14	915.614
control	F1	LC14	d1	15	866.735
control	F1	LC14	d1	16	911.496
control	F1	LC14	d1	17	834.556
control	F1	LC14	d1	18	721.493
control	F1	LC14	d1	19	875.985
control	F1	LC14	d1	20	846.068
control	F1	LC14	d1	21	845.838
control	F1	LC14	d1	22	814.714
control	F1	LC14	d1	23	782.9
control	F1	LC14	d1	24	862.942
control	F1	LC14	d1	25	856.468
control	F1	LC14	d1	26	848.979
control	F1	LC14	d1	27	923.889
control	F1	LC14	d1	28	830.573
control	F1	LC14	d1	29	824.425
control	F1	LC14	d1	30	855.548
control	F1	LC14	d1	31	859.111
control	F1	LC14	d1	32	829.002
control	F1	LC14	d1	33	821.188
control	F1	LC14	d1	34	816.61
control	F1	LC14	d1	35	883.149
control	F1	LC14	d1	36	870.297
control	F1	LC14	d1	37	865.854
control	F1	LC14	d1	38	847.083
control	F1	LC14	d1	39	824.75
control	F1	LC14	d1	40	881.348
control	F1	LC14	d1	41	817.3
control	F1	LC14	d1	42	795.617
control	F1	LC14	d1	43	807.224
control	F1	LC14	d1	44	879.318
control	F1	LC14	d1	45	835.016
control	F1	LC14	d1	46	875.565
control	F1	LC14	d1	47	868.401
control	F1	LC14	d1	48	863.498
control	F1	LC14	d1	49	842.045
control	F1	LC14	d1	50	903.642
control	F1	LC14	d1	51	834.231
control	F1	LC14	d1	52	950.665
control	F1	LC14	d1	53	781.099
control	F1	LC14	d1	54	813.833
control	F1	LC14	d1	55	868.535
control	F1	LC14	d1	56	881.904
control	F1	LC14	d1	57	853.232
control	F1	LC14	d1	58	894.161
control	F1	LC14	d1	59	847.448
control	F1	LC14	d1	60	871.868
control	F1	LC14	d1	61	831.224
control	F1	LC14	d1	62	812.032
control	F1	LC14	d1	63	838.713
control	F1	LC14	d1	64	843.846
control	F1	LC14	d1	65	861.602
control	F1	LC14	d1	66	824.655
control	F1	LC14	d1	67	885.006
control	F1	LC14	d1	68	820.497
control	F1	LC14	d1	69	867.52
control	F1	LC14	d1	70	867.499
control	F1	LC14	d1	71	866.505
control	F1	LC14	d1	72	828.542
control	F1	LC14	d1	73	825.765
control	F1	LC14	d1	74	887.267
control	F1	LC14	d1	75	756.909
control	F1	LC14	d1	76	859.245
control	F1	LC14	d1	77	836.952
control	F1	LC14	d1	78	825.535
control	F1	LC14	d1	79	890.083
control	F1	LC14	d1	80	1031.26
control	F1	LC14	d1	81	892.4
control	F1	LC14	d1	82	874.97
control	F1	LC14	d1	83	887.402
control	F1	LC14	d1	84	871.273
control	F1	LC14	d1	85	825.305
control	F1	LC14	d1	86	829.462
control	F1	LC14	d1	87	889.948
control	F1	LC14	d1	88	921.858
control	F1	LC14	d1	89	888.703
postdauer	F1	LC14	d1	1	871.868
postdauer	F1	LC14	d1	2	790.714
postdauer	F1	LC14	d1	3	915.384
postdauer	F1	LC14	d1	4	883.609
postdauer	F1	LC14	d1	5	865.299
postdauer	F1	LC14	d1	6	844.076
postdauer	F1	LC14	d1	7	882.039
postdauer	F1	LC14	d1	8	889.488
postdauer	F1	LC14	d1	9	886.807
postdauer	F1	LC14	d1	10	893.646
postdauer	F1	LC14	d1	11	814.158
postdauer	F1	LC14	d1	12	835.706
postdauer	F1	LC14	d1	13	882.134
postdauer	F1	LC14	d1	14	880.793
postdauer	F1	LC14	d1	15	874.875
postdauer	F1	LC14	d1	16	858.785
postdauer	F1	LC14	d1	17	901.555
postdauer	F1	LC14	d1	18	887.592
postdauer	F1	LC14	d1	19	893.836
postdauer	F1	LC14	d1	20	894.986
postdauer	F1	LC14	d1	21	889.948
postdauer	F1	LC14	d1	22	900.77
postdauer	F1	LC14	d1	23	873.669
postdauer	F1	LC14	d1	24	785.581
postdauer	F1	LC14	d1	25	859.935
postdauer	F1	LC14	d1	26	873.304
postdauer	F1	LC14	d1	27	861.562
postdauer	F1	LC14	d1	28	842.831
postdauer	F1	LC14	d1	29	867.099
postdauer	F1	LC14	d1	30	804.448
postdauer	F1	LC14	d1	31	837.468
postdauer	F1	LC14	d1	32	893.836
postdauer	F1	LC14	d1	33	876.025
postdauer	F1	LC14	d1	34	743.136
postdauer	F1	LC14	d1	35	881.444
postdauer	F1	LC14	d1	36	890.734
postdauer	F1	LC14	d1	37	911.036
postdauer	F1	LC14	d1	38	821.973
postdauer	F1	LC14	d1	39	945.206
postdauer	F1	LC14	d1	40	916.399
postdauer	F1	LC14	d1	41	938.828
postdauer	F1	LC14	d1	42	859.705
postdauer	F1	LC14	d1	43	874.779
postdauer	F1	LC14	d1	44	869.281
postdauer	F1	LC14	d1	45	848.844
postdauer	F1	LC14	d1	46	768.477
postdauer	F1	LC14	d1	47	832.104
postdauer	F1	LC14	d1	48	747.294
postdauer	F1	LC14	d1	49	833.12
postdauer	F1	LC14	d1	50	829.518
postdauer	F1	LC14	d1	51	778.417
postdauer	F1	LC14	d1	52	803.202
postdauer	F1	LC14	d1	53	858.555
postdauer	F1	LC14	d1	54	921.207
postdauer	F1	LC14	d1	55	752.427
postdauer	F1	LC14	d1	56	424.767
postdauer	F1	LC14	d1	57	858.46
postdauer	F1	LC14	d1	58	805.558
postdauer	F1	LC14	d1	59	897.858
postdauer	F1	LC14	d1	60	875.2
postdauer	F1	LC14	d1	61	889.948
postdauer	F1	LC14	d1	62	893.511
control	F1	LC14	d8	1	830.018
control	F1	LC14	d8	2	830.898
control	F1	LC14	d8	3	844.862
control	F1	LC14	d8	4	770.507
control	F1	LC14	d8	5	819.387
control	F1	LC14	d8	6	759.551
control	F1	LC14	d8	7	840.934
control	F1	LC14	d8	8	413.026
control	F1	LC14	d8	9	848.749
control	F1	LC14	d8	10	746.929
control	F1	LC14	d8	11	694.908
control	F1	LC14	d8	12	693.607
control	F1	LC14	d8	13	779.433
control	F1	LC14	d8	14	738.463
control	F1	LC14	d8	15	746.603
control	F1	LC14	d8	16	884.26
[truncated: 404 more rows]

## Sheet: F1_StarvationSurvival
condition	replicate.id	1	3	5	7	9	11	13	15	17	19	21
Control	LC10	0.988636	0.955556	0.974359	0.956522	1	0.922222	0.819444	0.5	0.188235	0.1	0
Control	LC11	1	1	1	0.984615	0.958904	0.857143	0.376812	0	0	0	0
Control	LC12	0.990741	0.963415	0.935897	0.86	0.892857	0.516667	0.236559	0.0597015	0	0	0
Control	LC14	0.989583	0.987805	0.969697	0.954545	1	0.77551	0.590909	0.242424	0	0	0
Control	rep1	1	0.98	1	0.833333	0.56701	0.0659341	0
Control	rep2	1	0.981651	0.910112	0.942529	0.632184	0.296296	0.0384615	0
Control	rep3	1	0.859155	0.64	0.41573	0.0520833		0
Postdauer	LC10	1	0.989796	0.940171	0.926316	0.893805	0.736364	0.541176	0.318182	0.0416667	0	0
Postdauer	LC11	0.946809	0.936709	0.717172	0.184783	0.0163934	0.0153846	0	0	0	0	0
Postdauer	LC12	0.979381	1	0.931818	0.84375	0.924051	0.592105	0.242424	0.0289855	0.0322581	0	0
Postdauer	LC14	0.93617	1	1	0.987179	0.953488	0.527778	0.238095	0.0597015	0.0222222	0	0
Postdauer	rep1	0.924242	1	0.708333	0.207792	0.0126582	0
Postdauer	rep2	1	0.916667	0.935484	0.876543	0.493151	0.0454545	0
Postdauer	rep3	0.965116	0.904762	0.810811	0.573333	0.0337079		0
