# Supplementary material
Source: publisher figshare collection journal article supplement (https://gsajournals.figshare.com/articles/dataset/_/6510158)
Supplement: Supplementary file 2 [file 2]

| <b>STARVATION SURVIVAL</b>                               | <b>Avg median survival (days)</b> | <b>StDev (days)</b> | <b>n</b> | <b>Avg delta compared to control (days)</b> | <b>StDev of deltas compared to control (days)</b> | <b>p-value vs. control</b> |
|----------------------------------------------------------|-----------------------------------|---------------------|----------|---------------------------------------------|---------------------------------------------------|----------------------------|
| <b><i>F1 progeny of long-term dauer and control</i></b>  |                                   |                     |          |                                             |                                                   |                            |
| Control                                                  | 11                                | 3                   | 7        | N/A                                         | N/A                                               | N/A                        |
| Long-term dauer                                          | 9.1                               | 3.1                 | 7        | -1.9                                        | 2.6                                               | 0.11                       |
| <b><i>F3 progeny of long-term dauer and control</i></b>  |                                   |                     |          |                                             |                                                   |                            |
| Control                                                  | 10.5                              | 1.1                 | 8        | N/A                                         | N/A                                               | N/A                        |
| Long-term dauer                                          | 11.9                              | 0.6                 | 8        | 1.4                                         | 1.1                                               | 0.01                       |
| <b><i>F3 progeny of short-term dauer and control</i></b> |                                   |                     |          |                                             |                                                   |                            |
| Control                                                  | 13.3                              | 1.6                 | 4        | N/A                                         | N/A                                               | N/A                        |
| Short-term dauer                                         | 13.3                              | 1.5                 | 4        | 0.08                                        | 0.4                                               | 0.73                       |

| <b>LIFESPAN</b>                                         | <b>Avg median lifespan (days)</b> | <b>StDev (days)</b> | <b>n</b> | <b>Avg delta compared to control (days)</b> | <b>StDev of deltas compared to control (days)</b> | <b>p-value vs. control</b> |
|---------------------------------------------------------|-----------------------------------|---------------------|----------|---------------------------------------------|---------------------------------------------------|----------------------------|
| <b><i>F3 progeny of long-term dauer and control</i></b> |                                   |                     |          |                                             |                                                   |                            |
| Control                                                 | 13.4                              | 1.2                 | 3        | N/A                                         | N/A                                               | N/A                        |
| Long-term dauer                                         | 15.6                              | 0.6                 | 3        | 2.2                                         | 0.6                                               | 0.02                       |
