# Supplementary material
Source: publisher figshare collection journal article supplement (https://gsajournals.figshare.com/articles/dataset/_/6510158)
Supplement: Supplementary file 3 [file 2]

| <b>RNA-SEQ SAMPLE</b>                                               | <b># MAPPED</b> | <b># UNMAPPED</b> | <b>EFFICIENCY</b> |
|---------------------------------------------------------------------|-----------------|-------------------|-------------------|
| <b><i>Control Starved F3 - 12 biological replicates</i></b>         |                 |                   |                   |
| LC10_Ctrl_24hr                                                      | 32834535        | 6924021           | 0.825848278       |
| LC11_Ctrl_24hr                                                      | 25725004        | 5137434           | 0.833537649       |
| LC12_Ctrl_24hr                                                      | 25849669        | 5442540           | 0.82607364        |
| LC14_Ctrl_24hr                                                      | 31810136        | 6681212           | 0.826423018       |
| LC6_Ctrl_24hr                                                       | 26427274        | 5814912           | 0.819648953       |
| Ctl_F3_24hr_13                                                      | 13990441        | 2973504           | 0.824716244       |
| Ctl_F3_24hr_14                                                      | 11235495        | 2378708           | 0.825277469       |
| Ctl_F3_24hr_16                                                      | 14829037        | 3024602           | 0.830589047       |
| Ctl_F3_24hr_2                                                       | 14634772        | 3139308           | 0.823377187       |
| Ctl_F3_24hr_4_10                                                    | 13408271        | 2738449           | 0.83040215        |
| Ctl_F3_24hr_6                                                       | 15042021        | 3092835           | 0.829453567       |
| Ctl_F3_24hr_7                                                       | 11221772        | 2309588           | 0.8293159         |
| <b><i>Long-term Dauer Starved F3 - 6 biological replicates</i></b>  |                 |                   |                   |
| LC3_40d_Dauer_24hr                                                  | 29169227        | 5539511           | 0.840400103       |
| LC3_49d_Dauer_24hr                                                  | 30636291        | 6237570           | 0.830840334       |
| Dauer_F3_24hr_2                                                     | 9738327         | 2283507           | 0.810053358       |
| Dauer_F3_24hr_4                                                     | 11349936        | 2415777           | 0.824507674       |
| Dauer_F3_24hr_6                                                     | 9934638         | 2058593           | 0.828353761       |
| Dauer_F3_24hr_7                                                     | 11751960        | 2413962           | 0.829593725       |
| <b><i>Short-term Dauer Starved F3 - 9 biological replicates</i></b> |                 |                   |                   |
| LC11_Dauer_24hr                                                     | 29324006        | 6041209           | 0.829176523       |
| LC12_Dauer_24hr                                                     | 29269686        | 6040431           | 0.828932003       |
| LC13_Dauer_24hr                                                     | 26657633        | 5551571           | 0.82764023        |
| LC14_Dauer_24hr                                                     | 25629471        | 4902756           | 0.83942357        |
| LC6_Dauer_24hr                                                      | 24711715        | 5228390           | 0.825371688       |
| Dauer_F3_24hr_10                                                    | 12065068        | 2568112           | 0.824500758       |
| Dauer_F3_24hr_13                                                    | 11209967        | 2315249           | 0.828819813       |
| Dauer_F3_24hr_14                                                    | 10301195        | 2191493           | 0.824577945       |
| Dauer_F3_24hr_16                                                    | 13773389        | 2831932           | 0.829456353       |
| <b><i>Control Fed F3 - 4 biological replicates</i></b>              |                 |                   |                   |
| LC10_Ctrl_18hr                                                      | 24676491        | 5149346           | 0.827352842       |
| LC11_Ctrl_18hr                                                      | 31873304        | 6458707           | 0.831506179       |
| LC12_Ctrl_18hr                                                      | 26639956        | 5543491           | 0.827753348       |
| LC14_Ctrl_18hr                                                      | 25746299        | 5240181           | 0.830888149       |
| <b><i>Long-term Dauer Fed F3 - 3 biological replicates</i></b>      |                 |                   |                   |
| LC3_40d_Dauer_18hr                                                  | 28607065        | 4821017           | 0.855779431       |
| LC3_49d_Dauer_18hr                                                  | 26245947        | 5403517           | 0.829269873       |
| LC4_49d_Dauer_18hr                                                  | 29142225        | 5662934           | 0.837296132       |
| <b><i>Short-term Dauer Fed F3 - 4 biological replicates</i></b>     |                 |                   |                   |
| LC11_Dauer_18hr                                                     | 26180236        | 5207348           | 0.834095291       |
| LC12_Dauer_18hr                                                     | 27895260        | 5697380           | 0.830397968       |
| LC13_Dauer_18hr                                                     | 27559146        | 5767547           | 0.826939115       |
| LC14_Dauer_18hr                                                     | 29016836        | 6020255           | 0.828174805       |
